## The evolution of red colour vision is linked to coordinated rhodopsin tuning in lycaenid butterflies

Marjorie A. Liénard<sup>a,b,\*</sup>, Gary D. Bernard<sup>c</sup>, Andrew A. Allen<sup>a</sup>, Jean-Marc Lassance<sup>b</sup>, Siliang Song<sup>b</sup>, Richard Rabideau Childers<sup>b</sup>, Nanfang Yu<sup>d</sup>, Dajia Ye<sup>b</sup>, Adriana Stephenson<sup>b</sup>, Wendy A. Valencia-Montoya<sup>b</sup>, Shayla Salzman<sup>b</sup>, Melissa R.L. Whitaker<sup>b</sup>, Michael Calonje<sup>e</sup>, Feng Zhang<sup>a</sup>, Naomi E. Pierce<sup>b,\*</sup>

<sup>a</sup> The Broad Institute of MIT and Harvard, Cambridge, MA 02142, USA.

<sup>b</sup> Department of Organismic and Evolutionary Biology and Museum of Comparative Zoology, Harvard University, Cambridge, MA 02138, USA.

<sup>c</sup> Department of Electrical & Computer Engineering, University of Washington, Seattle, WA, USA.

<sup>d</sup> Department of Applied Physics and Applied Mathematics, Columbia University, New York, NY 10027, USA

<sup>e</sup> Montgomery Botanical Center, 11901 Old Cutter Road, Miami, FL 33156, USA.

### Present addresses:

Department of Biology, Lund University, Lund, Sweden (MAL), Department of Ecology and Evolutionary Biology, University of Michigan, 500 S. State Street, Ann Arbor, MI 48109, USA. (SiSo), Department of Biology, University of Pennsylvania, PA 19104, USA (DY); Gene therapy program, University of Pennsylvania, PA 19104, USA (AS); School of Integrative Plant Sciences, Section of Plant Biology, Cornell University, 502 Mann Library, Ithaca, NY 14853, USA (ShSa); Entomological Collection, Department of Environmental Systems Science, ETH Zürich, Zürich, Switzerland (MRLW)

### \*Corresponding authors:

Marjorie A. Liénard, Biology Department, Lund University, Sölvegatan 35B, 22362 Lund, Sweden, marjorie.lienard@biol.lu.se

Naomi E. Pierce, Department of Organismic and Evolutionary Biology, MCZ laboratories 4<sup>th</sup> floor, Harvard University, 26 Oxford Street, Cambridge, MA 02138, USA, npierce@oeb.harvard.edu

### ORCIDs in alphabetical order by last name:

GDB: 0000-0001-7460-5123, RRC: 0000-0002-7137-3192, JML: 0000-0002-3675-6956, MAL: 0000-0003-3193-3666, WVM: 0000-0001-9246-2330, NEP: 0000-0003-3366-1625, SSa: 0000-0001-6808-7542, MRLW: 0000-0002-8774-8518, NY: 0000-0002-9462-4724

### Classification

Biological Sciences, Evolution, Ecology/Molecular Biology

### This PDF file includes:

Main Text, Figures 1 to 7, Supplementary appendix (Figures S1 to S5, datafiles S1-S2)

1 **Abstract**

2 Colour vision is largely mediated by changes in number, expression, and spectral  
3 properties of rhodopsins, but the genetic mechanisms underlying adaptive shifts in  
4 spectral sensitivity remain largely unexplored. Using *in vivo* photochemistry,  
5 optophysiology, and *in vitro* functional assays, we link variation in eye spectral sensitivity  
6 at long wavelengths to species-specific absorbance spectra for LW opsins in lycaenid  
7 butterflies. In addition to loci specifying an ancestral green-absorbing rhodopsin with  
8 maximum spectral sensitivity ( $\lambda_{\max}$ ) at 520-530 nm in *Callophrys sheridanii* and  
9 *Celastrina ladon*, we find a novel form of red-shifted LW rhodopsin at  $\lambda_{\max} = 565$ -570 nm  
10 in *Arhopala japonica* and *Eumaeus atala*. Furthermore, we show that *Ca. sheridanii* and  
11 *Ce. ladon* exhibit a smaller bathochromic shift at BRh2 (480-489 nm), and with the  
12 ancestral LW rhodopsin, cannot perceive visible red light beyond 600 nm. In contrast,  
13 molecular variation at the LW opsin in *A. japonica* and *E. atala* is coordinated with tuning  
14 of the blue opsin that also shifts sensitivity to longer wavelengths enabling colour  
15 discrimination up to 617 nm. We then use *E. atala* as a model to examine the interplay  
16 between red and blue spectral sensitivity. Owing to blue duplicate expression, the spatial  
17 distribution of opsin mRNAs within an ommatidium defines an expanded retinal  
18 stochastic mosaic of at least six opsin-based photoreceptor classes. Our mutagenesis *in*  
19 *vitro* assays with BRh1 ( $\lambda_{\max} = 435$  nm) chimeric blue rhodopsins reveal four main  
20 residues contributing to the 65 nm bathochromic shift towards BRh2 ( $\lambda_{\max} = 500$  nm).  
21 Adaptations in this four-opsin visual system are relevant for discrimination of conspecific  
22 reflectance spectra in *E. atala*. Together, these findings illustrate how functional changes  
23 at multiple rhodopsins contribute to the evolution of a broader spectral sensitivity and  
24 adaptation in visual performance.

25 **Keywords**

26 molecular evolution, ecological adaptation, visual system/vision, rhodopsin, spectral sensitivity,  
27 insects, Lepidoptera

28 **Significance Statement**

29 Rhodopsins are photosensitive protein molecules that absorb specific wavelengths of  
30 incoming light and convey colour information in the visual system. We show that  
31 molecular evolution in a green insect opsin gene resulted in a shift in its maximal  
32 absorbance peak, enabling some lycaenid butterflies to use spectral energy of longer  
33 wavelengths (LW) to discriminate colours in the red spectrum better than relatives  
34 bearing ancestral green LW rhodopsins. Lycaenids also evolved a duplicate blue opsin

35 gene, and we illustrate an example where species equipped with red LW rhodopsins  
36 shifted their blue sensitivity peak to longer wavelengths due to changes in several blue-  
37 tuning residues that have evolved repeatedly in different insect lineages. We  
38 demonstrate how changes at multiple vision genes in the insect eye effectively create a  
39 coordinated mechanism expanding spectral sensitivity for visually guided behaviours  
40 such as selecting host plants and mates.

## 41 **Introduction**

42

43 Multiple studies have demonstrated the important contributions of gene duplication and  
44 protein-coding changes in the evolution of novelty in lineage-specific phenotypic traits (1-  
45 3). For instance, gene duplication combined with modifications leading to functional  
46 divergence has contributed to gene family expansion, ultimately increasing  
47 transcriptional and functional diversity across lineages (2, 4). Recent examples show  
48 that specialization of ancestral functions (5-7) or cooperation between encoded products  
49 of duplication (8) are common mechanisms resolving constraints in existing eukaryotic  
50 gene networks (9). Genomic segmental duplications have also been shown to promote  
51 repeated allelic fixation, linking adaptive duplicated loci to convergent evolutionary  
52 pathways (10).

53 However, structural, functional, or gene network constraints can impose  
54 evolutionary trade-offs if there is limited variation for alternative biochemically stable  
55 encoded products among duplicated loci within multigene families (9, 11). Characterizing  
56 the molecular patterns of evolution within multigene families, and identifying the  
57 functional role of mutations at lower taxonomic scales is needed to distinguish the  
58 multiple sources of molecular variation. This includes the relative roles of gene  
59 duplication, expression changes, protein sequence divergence and convergence, or  
60 cellular relocalization of encoded gene products that contribute to new or convergent  
61 phenotypes within lineages (2, 7, 8, 12, 13).

62 Opsins belong to a diverse multigene family of G protein-coupled receptors,  
63 offering a robust framework to study how molecular changes can ultimately cause  
64 changes in behaviour and favour diversification (14). Opsins bind to a small non-protein  
65 retinal moiety derived from vitamin A to form photosensitive rhodopsins and enable  
66 vision across animals (15-18). The evolution of vision across the animal kingdom has  
67 long been linked to independent opsin gene gains and losses (19-23), genetic variation  
68 across opsins (15, 24-26), and spectral tuning mutations within opsins (27, 28). These  
69 molecular mechanisms, together with alterations in visual regulatory networks (29), have  
70 been shown to contribute to rhodopsin adaptation and the diversification of spectral  
71 sensitivity phenotypes in insects (18, 30, 31) and vertebrates including fish, birds, bats  
72 and primates (32-36). Thus multiple levels of organization, including the evolutionary

73 diversification of opsin subfamilies, their functional properties and regulatory networks  
74 constitute the mechanistic basis for organisms to discriminate light sources of varying  
75 wavelengths and ultimately interpret them as colours, yet how multiple changes across  
76 opsin paralog repertoires impact spectral sensitivity at small taxonomic scales has been  
77 understudied.

78         The evolution of insect colour vision in particular shows how a complex sensory  
79 trait can play a central role in adaptations involving signalling and mate communication  
80 (18, 31, 37, 38). Whereas the ancestral repertoire of insects involved three types of light-  
81 absorbing rhodopsin genes: ultraviolet (UVRh, 350nm), blue (BRh, 440 nm) and green,  
82 also called long-wavelength (LWRh, 530nm) (18), today's genomes harbor smaller or  
83 larger rhodopsin repertoires with strong experimental evidence for repeated functional  
84 convergence toward UV, Blue and LW spectral sensitivities across lineages. For  
85 example, beetles lost their ancestral blue opsin gene 300 million years ago, and  
86 compensated for the loss of blue sensitivity via either UV or LW gene duplication across  
87 lineages (23, 39). Blue opsin duplications occurred independently in pierid and lycaenid  
88 butterflies (27, 30, 40-42); and extend photosensitivity into the UV/blue in *Heliconius*  
89 spp. with  $\lambda_{\max}$  = 355 nm and 398 nm (21) and into the violet/blue, in *Pieris rapae* with  $\lambda_{\max}$   
90 = 420 and 450 nm (27). UV and LW duplications occurred in butterflies, hemipterans and  
91 dragonflies (20, 22, 26, 30, 43-45). In butterflies, LW opsin duplications have been  
92 identified in two papilionids, *Papilio xuthus* (31) and *Graphium sarpedon* (46) as well as  
93 a riodinid (*Apodemia mormo*) (20, 47), and contribute to extend spectral sensitivity into  
94 the far red.

95         Although duplicated LW opsins have never been detected in the families  
96 Nymphalidae, Pieridae or Lycaenidae (25, 40, 41), photoreceptor types with sensitivity  
97 peaks in the red have been identified in these groups (40, 41). This supports the  
98 hypothesis that additional mechanisms such as lateral filtering and/ or molecular  
99 variation of ancestral LW opsin genes also contribute to modify long-wavelength  
100 sensitivity.

101         For example, photostable lateral filtering pigments are relatively widespread  
102 across butterfly lineages (e.g. *Heliconius* (21), *Papilio* (45), *Pieris* (48), *Colias erato* (49),  
103 and some moths (*Adoxophyes orana*, (50); *Paysandisia archon* (51)). These pigments

104 act as long-pass filters, absorbing short wavelengths and pushing the sensitivity peak of  
105 LW photoreceptors into the red, to create distinct spectral types that can contribute to  
106 colour vision (19, 31, 40, 48, 52, 53). Lateral filtering can shift peak sensitivity to longer  
107 wavelengths while reducing peak amplitude, but cannot *extend* photoreceptor sensitivity  
108 into the far red beyond the exponentially decaying long-wavelength rhodopsin  
109 absorbance spectrum (52). Molecular variation of ancestral LW opsin genes could  
110 potentially extend photoreceptor sensitivity, but this mechanism has remained difficult to  
111 disentangle from the effects of filtering granules using classical electrophysiological  
112 approaches (31, 53, 54).

113 The molecular underpinnings of mammalian MWS/ LWS spectral tuning has  
114 been studied using mutagenesis experiments and led to the identification of critical  
115 amino acid replacements and their interactions at key residues (55, 56). Most  
116 mammalian lineages possess long-wavelength sensitive (LWS) cone opsins that specify  
117 Medium (M,  $\lambda_{\max}$  510-540 nm) and Long (L,  $\lambda_{\max}$  > 540 nm) rhodopsins. In humans,  
118 trichromatic vision is conferred through the use of Short (S,  $\lambda_{\max}$  = 414 nm), and tandem  
119 duplicate M ( $\lambda_{\max}$  = 530 nm) and L ( $\lambda_{\max}$  = 560 nm) cone rhodopsins (34), that collectively  
120 allow us to discriminate longer wavelengths of light as green-red colours (57, 58). In  
121 birds, tetrachromatic vision is based on two SWS cone opsins, together with a green M  
122 opsin ( $\lambda_{\max}$  = 497-514 nm) and a red-sensitive LWS opsin ( $\lambda_{\max}$  = 543-571 nm) (reviewed  
123 in 59). In insects, the evolution of red receptors occurred independently multiple times  
124 (30) but the possible contribution of molecular variation to insect LW opsin gene  
125 diversification has remained elusive, notably due to difficulties in expressing LW opsins  
126 *in vitro* (27, 60, 61, but see 62). Red receptors are intriguingly very common in butterflies  
127 compared to other insect groups such as bees or beetles (30), raising the possibility that  
128 perception of longer wavelengths plays an important role in the context of foraging (31,  
129 46, 63), oviposition (64, 65) and mate recognition (25) for species equipped with them.

130 Lycaenids comprise the second largest family of butterflies, representing almost  
131 thirty percent of all species, and exhibiting considerable ecological and morphological  
132 diversity (66, 67). Pioneering work showed that species of Lycaenidae in the genera  
133 *Lycaena* and *Polyommatus* have expanded spectral sensitivity at long wavelengths, and  
134 this has been postulated to arise from filtering pigments, modified opsins or both (19, 40,

135 41). Here, by combining physiological, molecular and functional approaches, we identify  
136 additional lycaenid species with red photoreceptors and elevated spectral sensitivity at  
137 long wavelengths, and show that their LW opsin locus specifies a novel type of LW  
138 rhodopsin with red-shifted maximal absorbance. We focus on the Atala hairstreak  
139 (*Eumaeus atala*) as a suitable model to show the interplay between regulatory and  
140 adaptive changes at multiple opsin loci in the evolution of red spectral sensitivity and link  
141 the evolution of finely tuned four-opsin vision to relevant visually guided behaviours in  
142 these butterflies.

143 **Results**  
144

145 ***H Hairstreak butterflies with elevated sensitivity at long wavelengths express red-***  
146 ***shifted rhodopsin receptors***

147 A photographic series at distinct elevations in the eye revealed dramatic differences in  
148 eyeshine colouration between two pairs of lycaenids (Fig. 1 insets and Fig. S1). The  
149 Spring Azure, *Celastrina ladon* (subfamily Polyommatae) and Sheridan's green  
150 hairstreak, *Callophrys sheridanii* (subfamily Theclinae), present homogeneous green  
151 and orange eyeshine in their dorsal eyes at 30° elevation, with a relatively small number  
152 of red ommatidia (*Ce. ladon*, 5%; *Ca. sheridanii*, 16%) (Fig. S1A-B). By contrast, the  
153 Japanese Oakblue, *Arhopala japonica*, and the Atala Hairstreak, *Eumaeus atala* (both  
154 subfamily Theclinae), share high levels of saturated red eyeshine in the dorso-equatorial  
155 region, due at least in part to species-specific differences in rhodopsin content (Fig. 1,  
156 Fig. S1B).

157 We partially bleached eyeshine of *A. japonica* and *E. atala* using repeated white-  
158 light flashes to reveal two types of ommatidia. Some ommatidia were resistant to  
159 bleaching and maintained their red eyeshine owing to lateral filtering by cherry-red  
160 pigment granules located distally within the photoreceptor cells of those ommatidia. The  
161 rest of the ommatidia were bleached, suggesting the presence of red sensitive opsin-  
162 based photoreceptors in these two species (Fig. S1C).

163 To test for the presence of red sensitive receptors, we performed analyses of *in*  
164 *vivo* photochemical rhodopsin bleaching measurements of adult butterflies. These  
165 experiments revealed long wavelength (LW) spectral sensitivities in dark-adapted eyes  
166 of *A. japonica* with  $\lambda_{\max} \pm$  standard error at  $571 \pm 2.45$  nm ( $CI_{95\%} = 566$  to 576 nm) (Fig.  
167 1A) and *E. atala* with  $\lambda_{\max}$  at  $563$  nm  $\pm 0.9$  nm ( $CI_{95\%} = 561$  to 566 nm), respectively (Fig.  
168 1B). We found that the two other lycaenid species we studied, *Ca. sheridanii* and *Ce.*  
169 *ladon*, were difficult subjects for our *in vivo* methods. In *Ca. sheridanii*, a noisy difference  
170 spectra obtained by photochemistry provided an estimate at LW  $\lambda_{\max} = 518$  nm  $\pm 3.7$  nm  
171 for ( $CI_{95\%} = 511$  to 526 nm) (Fig. 1C). Similarly, in *Ce. ladon*, partial LW bleaches were  
172 not measurable due to low LW rhodopsin densities,.



173 We chose to examine in detail the *in vivo* and *in vitro* contributions of all  
174 rhodopsin pigments in *E. atala*, a multi-brooded and abundant hairstreak butterfly  
175 naturally occurring throughout the year in Florida (USA) (68). Unlike most lycaenids, *E.*  
176 *atala* larvae are extreme specialist herbivores on New World cycads in the genus *Zamia*  
177 and show an unusually bright aposematic colouration advertising toxins they sequester  
178 from their hosts (69). Conversely, the adult is a striking velvety black butterfly with bright  
179 blue and red colours on the wings and the abdomen (Fig. 1) and can collect nectar from  
180 43 species across 20 plant families (69)

181 We first analyzed epi-microspectrophotometric difference spectra obtained after  
182 intense ommatidial flashing from a series of interference filters, which in addition to  
183 identifying R565 (LW rhodopsin, Fig. 1B) allowed us to narrow down a blue rhodopsin at  
184 R440 (Fig. 2A). Optophysiology measurements confirmed that neither the R565 LW nor  
185 the R440 blue sensitive rhodopsins could be responsible for the high sensitivity around  
186 360 nm, which instead was due to UV-receptors (Fig. 2B, Table S2). Finally, a  
187 densitometric analysis of male and female eyes (Fig 2C-D, Tables S3-S4), showed that  
188 these physiological data are best fit using least-squares regression by a model in which  
189 four rhodopsins are present in the eye with  $\lambda_{\max}$  values matching the LWRh rhodopsin as  
190 well as UVRh 360 nm, BRh1 441.3 nm  $\pm$  4.7 nm ( $CI_{95\%}$  = 431.7 to 450.9 nm, Table S2)  
191 and a second blue rhodopsin BRh2 494.2  $\pm$  1.2 nm ( $CI_{95\%}$  = 492 to 497 nm) (Fig. 2E-F,  
192 Tables S3-4).

193

#### 194 ***Red sensitivity is due to functional variation at long-wavelength opsin loci***

195 Transcriptomic mRNA profiling of *E. atala* yielded only a single LW opsin (Table S6),  
196 which is in line with earlier molecular evidence showing that lycaenid species possess  
197 one LW opsin gene (30, 40, 53). Accordingly, eye cDNA library screening using  
198 degenerated oligonucleotide primers followed by RACE cDNA amplification led to the  
199 characterization of single orthologous LW cDNA sequences in *Ce. ladon*, *Ca. sheridanii*  
200 and *A. japonica* (Fig. 3). We optimized an *in vitro* HEKT293 cell culture assay to  
201 reconstitute heterologous rhodopsin pigments (27, 61, 70, 71) by using a newly  
202 engineered heterologous vector to increase expression levels, and improving purification

203 procedures to obtain higher yields of actively reconstituted LW rhodopsins. Our  
204 expression cassette derives from the pcDNA5 plasmid and expresses coding opsin  
205 sequences tagged with a C-terminal FLAG epitope under a strong CMV promoter.  
206 Directly downstream the FLAG epitope, a short peptide linker plus a T2A cleavage  
207 cassette enable co-transcription of a fused cytoplasmic fluorescent mRuby2 coding  
208 sequence (Fig. 3A). This expression cassette proved to be efficient at detecting  
209 monomeric units of ultraviolet, blue and long-wavelength (LW) heterologous *E. atala*  
210 opsin proteins *in vitro* (Fig. S2A). It is also successful at reconstituting and purifying  
211 active LW rhodopsins, *i.e.* in *A. japonica*, *E. atala*, *Ca. sheridanii* and *Ce. ladon* lycaenid  
212 butterflies (Fig. 3B-F, Fig. S2B, Table S5).

213           When purified from large-scale HEK293T cell cultures and reconstituted *in vitro* in  
214 the dark in the presence of 11-*cis*-retinal, we found that the LW rhodopsin from *A.*  
215 *japonica* absorbs maximally at  $\lambda_{\max} = 574 \pm 4$  nm ( $CI_{95\%} = 570-586$  nm) (Fig. 3C) whereas  
216 that of *E. atala* absorbs maximally at  $\lambda_{\max} = 569 \pm 2$  nm ( $CI_{95\%} = 565-573$  nm) (Fig. 3D).  
217 The peak of absorbance of purified LW rhodopsin measurements is within confidence  
218 intervals of the best fit for LW linear absorbance estimates *in vivo* and supports the  
219 hypothesis that the LW rhodopsin limb of absorbance in these two species pushes red  
220 sensitivity above 600 nm. The LW rhodopsin pigment from *Ca. sheridanii* absorbs  
221 maximally at  $\lambda_{\max} = 519.2$  nm  $\pm 1.1$  ( $CI_{95\%} = 517-521$  nm) (Fig. 3E), which is in  
222 accordance with photochemical measurements (Fig. 1C), whereas *Ce. ladon* LW  
223 rhodopsin absorbs maximally at  $\lambda_{\max} = 531.7 \pm 1.5$  nm ( $CI_{95\%} = 529-535$  nm) (Fig. 3F,  
224 Table S5).

225           In summary, these findings indicate that our expression system can be used  
226 successfully to assess the functionality of LW rhodopsins outside of the complex eye  
227 environment and demonstrate that at least some hairstreaks (Theclinae) express a new  
228 functional type of far-red shifted visual opsin.

229

### 230 ***Blue opsin mRNA expression patterns lead to enhanced eye spectral richness***

231 Following photochemical and densitometric evidence that *E. atala* butterflies likely  
232 possess four rhodopsins including contributions from two blue rhodopsins, we identified

233 two differentially expressed blue opsin-like transcripts from the eye transcriptome,  
234 namely BRh1 and BRh2 (Table S6). We then examined their respective mRNA  
235 expression patterns in photoreceptor cells, aided by the histological reconstruction of  
236 photoreceptor organization in a typical ommatidium (Fig. 4).

237 We found that *E. atala* hairstreaks have a straight, 480-micron long rhabdom  
238 composed of eight longitudinal photoreceptor cells (Fig. 4A-B (a-g)) and a ninth cell  
239 close to the basement membrane (Fig. 4A-B (h)). The two most distal R1-R2  
240 photoreceptor cells contribute the majority of microvillar extensions from 0 to 160  
241 microns, whereas R3-R4 distal cells contribute a majority of microvilli from 140 to 300  
242 microns, thereby overlapping partially with R1-R2 in the distal rhabdom tier. The  
243 proximal R5-R8 cells contribute most microvilli in the last rhabdom tier up to 440  
244 microns, a depth where the photoreceptor cells no longer bear any microvilli and the  
245 ninth cell becomes visible (Fig. 4A-B (i)).

246 This rhabdomic analysis provided the spatial morphological insights necessary  
247 to subsequently identify photoreceptor cells expressing each opsin mRNA across  
248 different eye regions. Using double fluorescent *in situ* hybridization experiments in  
249 transverse and longitudinal eye sections of males and females of *E. atala*, we showed  
250 that LWRh is expressed in all ommatidia in the six photoreceptor cells R3 to R8 (Fig. 5),  
251 which is typical of many butterfly species (25, 29). No fluorescent signal was detected for  
252 the long-wavelength opsin in R1-R2 cells (Fig. 5D-F). We next examined the cellular  
253 localization of the short UV and medium blue opsin mRNAs in transverse sections in the  
254 dorsal eye. Using probes targeting LWRh in combination with cRNA probes for UVRh,  
255 BRh1 or BRh2 mRNAs, our data provide evidence that the latter rhodopsin mRNAs can  
256 be expressed in either or both R1-R2 receptor cells forming single ommatidia (Fig 5A-F).

257 We also assessed the possibility that these opsins are co-expressed in R1 and  
258 R2 cells using cRNA probes for UVRh and BRh1 (Fig. 5G), UVRh and BRh2 (Fig. 5H) or  
259 BRh1 and BRh2 (Fig. 5I). We find that R1 and R2 follow a one-cell one-opsin regulation  
260 pattern, with mutually exclusive expression of UVRh, BRh1 and BRh2 mRNAs (Fig. 5J).  
261 Females exhibit a dorso-ventral expression gradient in which BRh2-expressing cells are  
262 sparse in the dorsal eye region. In the ventral retina however, all three opsins (UVRh,  
263 BRh1, BRh2) are found in addition to LWRh (R3-R8) (Fig. S3).

264 Cellular expression data therefore show that both of the duplicated blue opsin  
265 mRNAs encode functional transcripts. Overall, the cellular localization of blue opsin  
266 duplicates in adjacent photoreceptor cells creates multiple ways in which rhodopsins are  
267 distributed within individual ommatidia, forming a local stochastic rhodopsin mosaic of at  
268 least six opsin-based photoreceptor classes (UV-UV, B1-B1, B2-B2, UV-B1, UV-B2, B1-  
269 B2, Fig. 5j). Additional structural features of the eye may also contribute to the diversity  
270 of spectral sensitivity functions of individual photoreceptors, including the spectral  
271 influence from lateral filtering granules found in distal rhabdomeres that add to the  
272 spectral sensitivity of some photoreceptor cells.

273

#### 274 ***BRh1 and Brh2 opsin duplicate loci encode blue and green-shifted rhodopsins***

275 We reconstituted active BRh1 and BRh2 rhodopsins *in vitro* and measured their spectral  
276 sensitivities via spectroscopy as detailed in the methods. We determined that BRh1  $\lambda_{\max}$   
277 = 435 nm  $\pm$  2 nm and BRh2  $\lambda_{\max}$  = 500 nm  $\pm$  2 nm (Fig. 6A-B, Table S7), thereby  
278 confirming that they encode the rhodopsins conferring the expanded blue to green  
279 spectral sensitivity in *E. atala*. In addition to its LWRh red-shifted opsin (Fig. 3D), *E. atala*  
280 uses a fourth rhodopsin that absorbs UV wavelengths *in vitro* at  $\lambda_{\max}$  = 352 nm  $\pm$  3.5 nm  
281 ( $Cl_{95\%}$  = 345-360 nm) (Fig. 3, Fig. S2d, Table S7).

282

#### 283 ***Four spectral tuning sites and epistasis leads to bathochromic shifts between*** 284 ***blue duplicates***

285 In order to understand the proximate mechanisms driving the 65 nm spectral shift  
286 between blue opsin duplicates, we performed homology modeling against the  
287 invertebrate squid rhodopsin (72). Along with their 380-aa long opsin protein sequences,  
288 Eat-BRh1 and Eat-BRh2 exhibit 101 amino acid residue differences (corresponding to  
289 73% similarity in aa sequence). Six variant sites were identified among 21 homologous  
290 residues located within 5Å of any carbon forming the *cis*-retinal binding pocket (Fig.  
291 6A,C). Two variant sites (S1 and S4) are shared with a blue/violet opsin duplication that  
292 occurred independently in pierid butterflies, causing a UV-shift (VRh  $\lambda_{\max}$  = 420 nm) from

293 the ancestral blue rhodopsin (BRh  $\lambda_{\max}$  = 450 nm) (27), whereas four residues are  
294 unique to duplicated blue opsins found in lycaenids (S2, S3,S5,S6).

295         Given this combination of shared and unique yet limited number of variant sites,  
296 we decided to test their possible involvement in blue spectral tuning by site-targeted  
297 mutagenesis. Specifically, we first modified individual residues S1 to S4 and measured  
298 their spectral tuning effect *in vitro* (Fig. 6E-G, Fig. S4). Chimeric opsins showing  
299 bathochromic shifts were used sequentially to substitute adjacent variant sites following  
300 two candidate evolutionary trajectories. We observed an additive bathochromic shift  
301 totaling 40 nm ( $\lambda_{\max}$  = 475 nm) by substituting A116S (S1) together with I120F (S2) and  
302 Y177F (S4) (Fig. 6E). In a second tuning trajectory, we observed that Y177F alone  
303 conferred a 79 nm bathochromic shift ( $\lambda_{\max}$  = 514 nm), which could then be  
304 compensated by a 6 nm hypsochromic shift ( $\lambda_{\max}$  = 508 nm) by combining G175S and  
305 A116S (Fig. 6G). A third evolutionary trajectory explored the contribution of two lycaenid-  
306 specific cysteine substitutions (I106C, F207C) in helix 5 (Fig. S4). These changes  
307 caused a strong green-wave spectral shift that was not compensated for by additional  
308 candidate interacting residues in the quintuple mutant (S1,2,4,5,6; Fig. S5, Table S8).  
309 G165S (S3) tested alone or in various double mutant combinations caused  
310 bathochromic shifts, but we did not obtain the sextuple chimeric construct bearing  
311 G175S (S3) and cannot therefore exclude the possibility that it also plays a role in this  
312 case. The available results from all variants bearing cysteines in S5 and S6, however,  
313 suggest that both cysteine residues on helix 5, which are absent in Pieridae blue opsins,  
314 are unlikely to be the main evolutionary drivers of blue spectral shifts in lycaenid BRh2  
315 loci.

316         Finally, our optophysiological density analyses showed that blue spectral  
317 sensitivity differs between species equipped with green or red LW rhodopsins. Whereas  
318 all species possess a blue photoreceptor with conserved absorbance with  $\lambda_{\max}$  = 435-  
319 440 nm, the second blue sensitivity peak in *A. japonica* and *E. atala* is at  $\lambda_{\max}$  = 500 nm  
320 (Fig. 2F, S5A) unlike  $\lambda_{\max}$  = 489 in *C. ladon* (Fig. S6B, Table S9). These data suggest a  
321 role for coordinated shifts between blue and LW rhodopsins in the evolution of red  
322 spectral sensitivity.

323

324 ***Shifted Blue and LW rhodopsins tune colour vision in the context of conspecific***  
325 ***recognition***

326 In order to investigate possible correspondence between *E. atala* visual spectral  
327 sensitivities and colour traits that might be important in signalling and sexual selection,  
328 we measured the reflectance spectra associated with specific wing patches (Fig. 7, SI  
329 Dataset 2). For the butterfly to interpret colours, it must i) possess at least two spectral  
330 types of receptors sensitive to the reflectance spectrum of incident visible light  
331 illuminating the coloured area, and ii) be able to compare individual receptor responses  
332 neurally to create an output chromatic signal (73). Although we did not take this analysis  
333 to the second step of recording responses of different individual receptors to reflectance  
334 spectra, we investigated in detail the first necessary condition by measuring and  
335 comparing reflectance spectra of body and wing patches from males and females  
336 including blue scales on the abdomen and thorax, as well as black, blue and red scales  
337 on forewings and hindwings (Fig. 7A). In males, dorsal forewings are bright iridescent  
338 blue in summer, whereas scales appear more generally green/ teal in winter generations  
339 (68). Female dorsal wings, on the other hand, display a darker royal blue colour along  
340 the edge of their upper forewings. Both sexes also have conserved wing and body  
341 patterns, including regularly spaced rows of blue spots visible on folded and unfolded  
342 hindwings, and a bright red abdomen with a large bright red spot on the mid-caudal  
343 hindwing area that falls precisely along the abdomen in folded wings (Fig. 1A, inset).

344 First, epi-microspectrophotometry measurements from dark areas of male and  
345 female wings (Fig. 7B) showed that black scales are only 1 % as reflective as adjacent  
346 cyan scales in the blue/green band at 450 nm, with a reflectance maximum of 0.053  
347 (female, *f*) and 0.041 (male, *m*) (SI datafile 2) compared to reflectance maxima at 510  
348 nm of ventral hindwing blue scales 1.53 (*f*) and 1.76 (*m*) (Fig. 7B). This indicates that  
349 brightness – which is a function of reflectance - in black regions decreases 100 fold  
350 compared to adjacent coloured scales in both sexes.

351 Blue scales on the dorsal forewings have a maximal reflectance peak at 490 nm  
352 in females and 510 nm in males, and blue scales on the ventral hindwings have a  
353 maximal reflectance peak at 510 nm (*f*) and 530 nm (*m*) (Fig. 7B). Thorax scale

354 reflectance is 1.86 times and 2.88 times higher than dorsal wing reflectance in females  
355 and males, respectively.

356 Red scales on male and female hindwings reflect maximally in the far red (750  
357 nm), similarly to abdominal scales (Fig. 7B-C). Blue scales on the thorax have a maximal  
358 reflectance peak at 490 nm in both sexes, overall indicating that male and female  
359 reflectance spectra are similar for blue scales on the body, but not for blue scales on the  
360 wings. We noted, too, that leaf surfaces of the butterfly's primary host cycad, *Zamia*  
361 *integrifolia*, have a peak of reflectance at 550 nm and a red edge inflection point around  
362 700 nm with high reflectance in the near infrared region (Fig. 7D). Altogether, our  
363 analyses support that the butterfly's photoreceptor spectral sensitivities (Fig. 7E) can  
364 efficiently discriminate between its host plant (for oviposition), the colours of male and  
365 female conspecifics, and colour variation between sexes.

## 366 Discussion

367

### 368 ***Red opsin receptors contribute to far-red spectral sensitivity***

369 It has remained challenging to identify the contribution of different genetic mechanisms  
370 that affect phenotypic variation amongst complex traits in nature, and ultimately an  
371 organism's fitness. Opsins represent a robust system to link molecular changes to  
372 phenotypic changes in animal colour vision as they are the first elements in  
373 phototransduction cascade and have been shown to directly modulate the visual spectral  
374 sensitivity of insects, primates and other vertebrates. We have optimized a functional  
375 assay to disentangle the contribution of the long-wavelength (LW) rhodopsin from  
376 filtering pigment granules and variable eye reflectance properties in the eyes of lycaenid  
377 butterflies. We discovered a novel functional form of LW rhodopsin with a red-shifted  
378 maximal absorbance spectrum ( $\lambda_{\max}$ ) between 565 and 575 nm in two lycaenid species,  
379 *A. japonica* and *E. atala*, that is further supported by microspectrophotometry (MSP) and  
380 optophysiology data (Figs. 1-3, Fig S5). The red-shifted rhodopsins have a longer-  
381 wavelength limb of absorbance than lycaenid green LW rhodopsins due to a  
382 bathochromic shift in their  $\lambda_{\max}$  (Figs. 1, 3), which elevates the photoreceptor response at  
383 long wavelengths (Fig. 2F, S5A). Consequently, those two species have much greater  
384 optophysiological sensitivity in the far red than the lycaenid species with photoreceptors  
385 expressing green LW rhodopsins, whether or not surrounded by lateral filtering  
386 pigments.

387 Red spectral sensitivity has previously been examined *in vivo* notably in a  
388 species of cabbage white butterfly, *Pieris rapae*, where light perception above 600 nm  
389 results from ommatidia expressing a single LW opsin together with two types of pigment  
390 granules that confer three types of red photoreceptors (48). Methods employing cAMP-  
391 dependent heterologous spectroscopy identified maximal peak absorptions at 540 nm  
392 and 560nm for *Papilio* PxRh1 and PxRh3 LW opsins respectively (62), whereas earlier  
393 electrophysiological  $\lambda_{\max}$  estimates placed PxRh1 at 525 nm and PxRh3 at 575 nm (45).  
394 Our assay provides quantifiable expression and yields to obtain accurate  $\lambda_{\max}$  *in vitro*  
395 outside of the complexity of the eye structure itself which circumvents potential  
396 inaccuracy from optophysiological estimates measured *in vivo* in certain species due to  
397 interfering lateral pigments or other properties of the eye itself. It also has the advantage



398 of functionally studying variation in orthologous rhodopsin genes independently from  
399 inferences based on sequence data alone. Our study reconciles *in vivo* and *in vitro*  
400 approaches to substantiate that higher visual performance in the far red is achieved by  
401 modifying absorbance properties of long-wavelength rhodopsins.

402

403 ***Duplication, spectral tuning and adjacent cellular localization provide expanded***  
404 ***photoreceptor types***

405 Opsin evolution has undergone recurrent events of gene duplication and loss across  
406 animals including insects (16). From ancestral insect trichromatic colour vision (UV, blue,  
407 green), insects that have lost one of these three rhodopsins are often found to have  
408 compensated from that loss by recruiting a duplicate gene copy that has undergone  
409 spectral tuning to shift the peak sensitivity, as seen in true bugs and beetles (23, 39). By  
410 contrast, tetrachromatic insects that activate an additional rhodopsin are also known to  
411 have acquired increased spectral sensitivity in ranges of visible light, as seen in  
412 *Heliconius* duplicated UV opsins (21), or *Pieris* duplicated blue opsins (27). Lycaenid  
413 species examined thus far have two blue opsins for which epi-microspectrophotometric  
414 estimates previously yielded sensitivities of  $\lambda_{\max}$  in the range 420-440 nm and 480-500  
415 nm (40, 41).

416 Our results show that blue opsin loci in *E. atala* specify blue and green-shifted  
417 rhodopsins (Figs 2,6) similarly to species of *Lycaena* and *Polyommatus* (40, 41). The  
418 most striking functional insight in the evolution of blue spectral tuning in *E. atala* comes  
419 from chimeric BRh1 variants bearing mutations A116S, G175S and Y177F, which confer  
420 a 73-nm bathochromic shift ( $\lambda_{\max} = 508$  nm) that most closely recapitulates the spectral  
421 properties of Eat-BRh2 ( $\lambda_{\max} = 500$  nm) compared to other tested variants (Fig. 5G, Fig  
422 S4). Intermediate adaptive phenotypes can also be revealed via gradual evolutionary  
423 trajectories. Eat-BRh1 variant A116S causes a +5 nm shift alone, but together with  
424 I120F, shifts maximal absorbance by an additional +15 nm to  $\lambda_{\max} = 455$  nm. Since these  
425 two residue substitutions are conserved across all characterized lycaenid BRh1 loci (Fig.  
426 3A), these results show how adjacent sites in helix 3 can contribute to intermediate blue  
427 absorbance spectra across lycaenids.

428           The third tuning residue, Tyr177Phe is a key spectral tuning mutation in *E. atala*,  
429 since the triple BRh1 variant (A116S/I120F/Y177F) displays a 30 nm bathochromic shift  
430 ( $\lambda_{\max} = 475$  nm) compared to its native rhodopsin, and illustrates the multiple ways that  
431 gradual spectral tuning can evolve, at least in this species. Two of the reverse tuning  
432 substitutions are the same sites responsible for hypsochromic spectral shifts both in a  
433 blue-shifted LW rhodopsin of a *Limenitis* butterfly (Y177F, -5 nm) (61) and in a violet-  
434 shifted blue rhodopsin of a *Pieris* butterfly (S116A, -13 nm; F177Y -4 nm) (27), stressing  
435 the importance of tuning residues lying on the ionone ring portion of the chromophore  
436 binding pocket. Spectral tuning modulation in blue-rhodopsin duplicate functions has  
437 therefore involved conserved biochemical constraints along independent evolutionary  
438 trajectories that selected for partial spectral tuning sites in rhodopsin G-coupled  
439 receptors. Reverse mutations are not functionally equivalent in their absolute  
440 magnitudes ( $\Delta\lambda_{\max}$ ), therefore underscoring the role of epistatic interactions with  
441 neighbouring sites resulting in distinct  $\lambda_{\max}$  shifts across butterfly lineages.

442           Molecular and phylogenetic studies of opsin evolution in vertebrates have also  
443 shown that homologous tyrosine residues in the ionone ring portion of the chromophore-  
444 binding pocket (e.g. Y262) in the human blue cone opsin ( $\lambda_{\max} = 414$  nm) are responsible  
445 for a 10 nm bathochromic spectral tuning when mutated to Tryptophan (Trp) (74). This  
446 illustrates that distant opsin loci meet similar structural and biochemical constraints as  
447 those observed in the evolution of vision genes in other vertebrates (11, 14). However,  
448 Y177 is unique to *E. atala*, and other BRh1 loci at this position readily possess the F177  
449 similarly to Eat-BRh2 (Fig. 3A). Not all BRh2 loci have S175 but instead keep G175 in  
450 both blue loci, suggesting an additional yet unknown role for adjacent residues in  
451 positions R176K and I178V. The latter residues do not differ highly in hydrophobicity but  
452 may still provide the necessary molecular interactions with the ionine ring portion of the  
453 chromophore necessary to modulate variable BRh2 spectral phenotypes. Human  
454 ancestors also achieved blue sensitivity gradually and almost exclusively via epistasis at  
455 seven amino acid residues (55). By studying independent opsin gene duplicates in the  
456 butterfly family Lycaenidae, our *in vitro* assays refine our understanding of the molecular  
457 basis of convergent colour vision phenotypes and help to identify key determinants of  
458 genotype-phenotype relationships across insect blue opsins, although these are only a  
459 snapshot of all possible chimeric blue rhodopsin variants along at least three possible

460 evolutionary trajectories. Testing the non-additive interactions at co-evolving BRh2  
461 adjacent sites (175-178) in lycaenids lacking red sensitivity will help to fully recapitulate  
462 intermediate phenotypes across derived blue-shifted rhodopsin duplicates in addition to  
463 those generated by A116S and I120F.

464

465 In theory, a typical tetrachromat can achieve better wavelength discrimination  
466 than a typical trichromat (55, 73) because of the interplay between additional gene  
467 copies and the coevolution of spectral tuning across rhodopsins decreases the minimal  
468 wavelength difference ( $\Delta\lambda$ ) that an insect can discriminate. *Papilio* butterflies, for  
469 instance, have some of the most complex retinal mosaics known, with three ommatidial  
470 types expressing various combinations of five rhodopsin proteins (UV, B, 3 LW), as well  
471 as filtering pigments that produce diverse ommatidial spectral sensitivities (29, 45).  
472 Amino acid residues in helix 3 have been shown to mediate an absorbance shift  
473 between duplicates LW P<sub>x</sub>Rh1 and P<sub>x</sub>Rh3 in *Papilio* (62), but lycaenid LW opsins  
474 possess a highly conserved helix 3 that does not exhibit any of the spectral substitutions  
475 found across Papilionidae, supporting the hypothesis that distinct spectral tuning  
476 mechanisms have evolved independently in invertebrate LW opsins. Future work will be  
477 able to disentangle the spectral tuning mechanisms of LW opsins *in vitro* using the  
478 recombinant purification system described here.

479 In *E. atala*, ommatidial density and expression profiling showed that  
480 photoreceptor cells containing BRh2 are less abundant (~25%) compared to those  
481 containing UV (~50%) and BRh1 (75%) rhodopsins. In spite of its low density across the  
482 eye, the derived green-shifted blue rhodopsin improves signal resolution in the green  
483 spectrum and provides direct adaptive benefits for light perception in both males and  
484 females. Compared to trichromats, the expanded six-ommatidial types primarily derive  
485 from the non-overlapping cellular expression of BRh1 and BRh2 rhodopsin mRNAs in  
486 distal rhabdomeric cells. Together, the stochastic rhodopsin mosaic offers remarkable  
487 properties that could not be achieved with the limited sensitivity of a single blue opsin  
488 gene.

489 In summary, our results support the scenario of a sensory system in which gene  
490 duplication generates new opsin paralogs, cis-regulatory changes generate new  
491 photoreceptor subtypes via gene-specific expression patterns, and coding mutations  
492 tune the spectral sensitivity maxima of two of the four rhodopsins (BRh2, LWRh). All of  
493 these changes have contributed to the diversification of visual spectral sensitivities,  
494 thereby enhancing colour discrimination.

495

#### 496 ***Co-evolving shifts at blue and red opsins tune intraspecific visual signalling***

497 Additional structural features of the eye can contribute to spectral sensitivity of individual  
498 photoreceptors at long wavelengths, including lateral filtering granules found in distal  
499 rhabdomeres. However, here the primary mechanism pushing red sensitivity is through  
500 functional divergence at the LW rhodopsin locus. This remarkable novelty provides a  
501 two-factor interaction (Blue-LW) to modulate green-red sensitivity among closely related  
502 taxa.

503 Building on earlier butterfly microspectrophotometry work (19, 40, 41, 53), our  
504 study shows that lycaenid species with red-shifted LW opsins have their second  
505 maximum sensitivity peak and associated blue rhodopsin shifted to green maximal  
506 absorbance with  $\lambda_{\max}$  495-500 nm. By contrast species with a LW ancestral-green opsin  
507 with  $\lambda_{\max}$  520-530 nm have their second maximum sensitivity peak at blue wavelengths  
508  $\lambda_{\max} = 480-490$  nm (Fig. 1C, S6A), suggesting modulatory benefits for coevolving  
509 spectral shifts at multiple rhodopsins. Within Lycaenidae, reflectance patterns of wing  
510 scales have been investigated in the genera *Celastrina* and *Callophrys* (75, 76) and  
511 these studies support a scenario of co-evolution of spectral shifts across opsins. The  
512 ventral wings visible at rest in Green Hairstreak lycaenids (genus *Callophrys*) typically  
513 appear green and consist of yellow and bluish scales with an omnidirectional reflectance  
514 peak in the green slightly above 550 nm (76). *Celastrina* species tend to display bright  
515 blue coloured wings, which predominantly reflect light in the UV-blue band (75) and can  
516 thus be perceived by comparing neuronally the spectral input from light activating retinal  
517 photoreceptors expressing both UV/ blue rhodopsins without requiring expanded red  
518 sensitivity.

519           These observations suggest a role for molecular tuning of blue and LW opsin  
520 genes in driving the dynamic evolution of green-red spectral sensitivity. Extant human  
521 trichromatic colour vision is similarly thought to have evolved via spectral tuning of  
522 existing short wavelength-sensitive opsins in concert with molecular variation at  
523 duplicated opsin loci leading to middle and long-wavelength sensitivities (55). Ultimately,  
524 mechanistic and functional studies of spectral tuning evolution in different orthologs in  
525 additional species will enable us to infer the ancestral states and better resolve the  
526 evolutionary time scale involved in stages of spectral tuning of blue and red sensitivities  
527 across lycaenids.

528

### 529 ***Colour tuning improves intraspecific signal detection***

530 Two effects of molecular variation in visual pigments in *E. atala* are that its eyes have  
531 expanded spectral sensitivity at longer wavelengths as well as increased spectral  
532 discrimination in the blue band. In order to investigate the evolutionary consequences of  
533 molecular changes in butterfly opsins in the broader context of behaviours requiring  
534 colour vision, such as finding oviposition sites, and intraspecific recognition (37, 77-80),  
535 we need to analyze the degree of overlap of spectral sensitivities (73) and evaluate this  
536 against the spectral composition of the reflected light of the background and other  
537 objects, such as that produced by foliage and conspecifics.

538           The limiting wavelength at which only the human L cone opsin ( $\lambda_{\max} = 559\text{-}563$   
539 nm) is sensitive corresponds to approximately 625 nm (81), which is the wavelength at  
540 which orange-red can be discriminated from pure red in human colour perception. The  
541 human neighboring M cone rhodopsin is at  $\lambda_{\max} = 530$  nm, which at 625 nm, has a  
542 sensitivity of 0.05 (81). By extension, for *E. atala*, BRh2 has a sensitivity of 0.05 at 613  
543 nm (Fig. 2, Fig. 6), indicating that R565 would perceive 'pure red' wavelengths of light  
544 from 613 nm onwards. Alternatively, we can compute the relative sensitivity of the LW  
545 rhodopsin at 700nm (3%, Fig. 1, Fig. 3), which is generally accepted as the limit for  
546 photopic vision, and then identify the corresponding wavelength at which BRh2 reaches  
547 that same sensitivity, which is 619 nm (Fig. 2). Conservatively, we can conclude that the  
548 red rhodopsin together with the green-shifted blue rhodopsin BRh2 of *E. atala* contribute

549 to the perception of colours at long-wavelengths up to 613 nm. The LW rhodopsin  
550 sensitivity in *A. japonica* is similar to *E. atala*, and the green-red visual spectral  
551 sensitivities of *Arhopala* butterflies would capture the dorsal wing secondary reflectance  
552 peak between 500-600 nm, which is absent in *Celastrina* or *Callophrys* wings (75).  
553 Dorsal *Arhopala* wings also have velvety black edges filled with blue regions that  
554 primarily reflect light at 370 nm in males and 400 nm in females (82) and further benefit  
555 from the expanded blue sensitivity seen across lycaenid butterflies. Similarly to super-  
556 black plumage colouration in birds (83), peacock spiders (84), and recent examples in  
557 papilionids and nymphalid butterflies (85), the adjacency and sex-specific regions  
558 covered with structural velvety black scales in the lycaenid *E. atala* likely enhance the  
559 perceived brightness of nearby colour signals.

560 Our wing scale analysis indicates that red colour discrimination is important to  
561 see conspecifics due to their striking reflectance above 600 nm (Fig. 7A). Reflectance  
562 spectra from the red abdomen and the ventral hindwing are similar and overlap spectral  
563 sensitivities of two rhodopsins (LWRh and BRh2), meaning the butterfly can not only  
564 detect brightness but can also derive a colour signal from these patterns, and separate  
565 these input signals from those of environmental colour cues such as signals produced by  
566 foliage (Fig. 7D) (86). Abdominal reflectance in the range 613-619 nm is roughly a third  
567 of its maximal reflectance, but there is substantial overlap of the abdomen's spectrum  
568 with BRh2 spectral sensitivity, which suggests that the *Atala* hairstreak's colour  
569 perception of the abdominal colour of conspecifics is not pure red, but something more  
570 like Orange-Red. All *Eumaeus* species have this orange-red colouration and the red  
571 scale reflectance spectra are similar between the sexes, suggesting that it evolved at the  
572 base of the *Eumaeus* genera, as an aposematic signal driven by the association with  
573 cycads (87). Whereas our results show a clear sex-specific reflectance difference on  
574 dorsal wings, it is unclear whether the red warning colouration patterns may have been  
575 coopted as a conspecific signal, as in other unpalatable butterflies (79, 88), in which  
576 case it could be a by-product of the evolution of a signal used primarily to avoid  
577 predation. Hence, the L cones of most birds have red sensitivity from about 550 nm to  
578 700 nm (59, 89), and the bright red abdominal/ hindwing reflectance in the near-infrared  
579 spectrum would stimulate mostly bird LWS /red (without MWS/ green) to perceive a  
580 colour close to "pure red".

581 Lycaenid butterflies with four rhodopsins can see more colour hues in the blue-  
582 green range than mammals that have either di or trichromatic vision (34). Sex-specific  
583 scale reflectance spectra on dorsal wings convey colour information that is readily  
584 distinguishable by the visual system. Our study, by showing the expanded spectral  
585 sensitivity exhibited by lycaenid butterflies through molecular variation and functional  
586 changes in their 4-rhodopsin visual system, highlights the importance of peripheral  
587 sensory genes in driving the adaptive evolution of multi-modal communication.

## 588 **Materials and Methods**

### 589 *Butterflies*

590 Pupae of *Eumaeus atala* were collected from host plants of *Zamia integrifolia* (locally  
591 known as “coontie”) at the Montgomery Botanical Garden, Miami, FL, USA and reared at  
592 22°C in an insectary in the MCZ laboratories under a 12:12 L:D cycle until emergence.  
593 *Callophrys sheridanii* and *Celastrina ladon* were collected on Badger Mountain,  
594 Wenatchee WA, USA and Wahclella Falls, OR, USA respectively. Eggs and young  
595 larvae of *Arhopala narathura japonica* were collected feeding on oak trees (*Quercus*  
596 *glauca*) from field sites near Ginoza, Okinawa, Japan and reared in the laboratory in  
597 Cambridge, MA, USA until they eclosed as adults.

598

### 599 *Epi-Microspectrophotometry*

600 Quantitative epi-microspectrophotometry (epi-MSP) was used to determine absorption  
601 spectra of butterfly rhodopsins by measuring eyeshine reflectance spectra after  
602 photoconversion of the rhodopsin to its metarhodopsin product (54, 90).

603 Compound eyes of most adult butterfly species exhibit eyeshine, a property that  
604 allows measuring rhodopsin absorbance spectra as well as spectral sensitivity of  
605 photoreceptor pupillary responses in eyes of intact butterflies. When subjected to  
606 repeated bright white flashes under incident-light microscope, 1) there is a  
607 photochemical effect, i.e. the coloration of eyeshine changes during each flash owing to  
608 changes in absorbance spectra that accompany photo-isomerization of rhodopsins to  
609 their metarhodopsin photoproducts (90); and 2) there is a pupillary response mediated  
610 by intracellular migration of pigment granules within photoreceptor cells, causing the  
611 intensity of eyeshine to decrease rapidly with time during each flash (91).

612 Three MSP methods (*in vivo* Photochemistry, Optophysiology, Retinal  
613 densitometry) are critical to study rhodopsin properties. The methods are presented  
614 here, whereas the rationale upon which the three methods are based and the general  
615 procedures for using eyeshine to make photochemical measurements from butterfly  
616 eyes are described in detail in SI methods.

617



618 *In vivo* Photochemistry

619 When rhodopsin is photo-isomerized to become metarhodopsin, it undergoes a spectral  
620 shift in the absorbance spectrum. For LW rhodopsins, the shift is to shorter wavelengths;  
621 the metarhodopsin peak is usually between 490 nm and 500 nm. For both UV-absorbing  
622 and blue-absorbing rhodopsins, the shift is to longer wavelengths, typically to 475 nm -  
623 490 nm. These photochemical changes are observable in eyeshine reflectance spectra,  
624 as increased reflectance caused by loss of rhodopsin, and decreased reflectance  
625 caused by the metarhodopsin. The computed absorbance-difference spectrum (DS),  
626 therefore, has a positive peak caused by accumulation of metarhodopsin (M), and a  
627 negative peak caused by loss of rhodopsin (R) (Fig. 1, 2A).

628 The absorbance difference spectrum relaxes with time in the dark, but changes  
629 shape in doing so; the positive peak relaxes to zero much faster than the negative peak.  
630 The entire temporal evolution of difference spectra can be reproduced quantitatively by  
631 assuming different kinetics for the dark-processes of metarhodopsin decay and  
632 rhodopsin recovery. Metarhodopsin decay is well approximated by a single exponential  
633 process, but the time constant is a strong function of temperature. Rhodopsin recovery  
634 is considerably slower than metarhodopsin decay, making it possible to create a partial  
635 bleach using repeated episodes of bright flashes followed by dark periods during which  
636 metarhodopsin decays totally from the rhabdom. The difference spectrum for that partial  
637 bleach is a direct measurement of the absorbance spectrum of the LW rhodopsin (Fig. 1  
638 (90)). Similar experiments with photoconversion of the other spectral types of rhodopsin  
639 are more complicated because a bright blue flash designed to efficiently photo-isomerize  
640 blue-absorbing rhodopsin will also convert some LW rhodopsins to their  
641 metarhodopsins, although with less efficiency. However if the LW rhodopsins are first  
642 bleached, then difference spectra for the blue rhodopsin are measurable (Fig. 2A).

643 Photochemical measurements of the *E. atala* blue rhodopsin were done with a  
644 male oriented similarly to the female at Elevation 0° and Azimuth 10°. Before  
645 photoconversion of the blue rhodopsin, the LW rhodopsins were partially bleached by  
646 flashing with 20s exposure to RG645 (20s, 2s/55s). After resting in the dark for 24 min  
647 for metarhodopsins to decay, the eye was flashed with 12s RG430 (2s/60s), which  
648 converted blue rhodopsin to its metarhodopsin M505. A difference spectrum for R440

649 was computed from reflectance spectra measured before and 9 min after the series of  
650 bright blue flashes.

651

### 652 *Optophysiology*

653 Photoreceptor cells in butterfly eyes contain intracellular pigment granules that move  
654 centripetally in response to bright illumination and deplete light from the rhabdom by  
655 scattering and absorption. This process creates an effective pupillary response  
656 observable as a decrease in eyeshine reflectance (91). This intracellular pigment  
657 migration is mediated exclusively by photo-isomerization of the rhodopsin contained  
658 within the same cell's rhabdomere and is not influenced by physiological responses of  
659 neighboring ommatidia. Thus, the pupillary pigment granules can be used as an optically  
660 measured intracellular probe of physiological responses to light from that cell (92).

661 A double-beam Epi-MSP apparatus was used for optophysiological  
662 measurements of eyeshine. One beam is deep-red filtered (e.g., 710 nm), that monitors  
663 continuously the reflectance of eyeshine but does not itself cause a pupillary response.  
664 The second beam delivers a monochromatic flash that evokes a pupillary response,  
665 measured by the first beam as a decrease in deep-red eyeshine reflectance. At each  
666 stimulating wavelength, the flash intensity is adjusted with computer-controlled neutral-  
667 density wheels to produce a criterion decrease in reflectance (usually 3% - 5%).  
668 Wavelength sequence is randomized. Both flash duration and inter-stimulus interval are  
669 held constant. After completing an experimental series, the butterfly is replaced by a  
670 factory calibrated Hamamatsu S1226 photodiode and quantum flux  $Q$  measured for  
671 every criterion combination of wavelength and wheel setting. Spectral sensitivity is  
672 computed as  $S(\lambda) = 1 / Q(\lambda)$ .

673

### 674 *Retinal Densitometry*

675 The visual pigment content of rhabdoms can be estimated quantitatively when the  
676 tapetal reflectance spectrum is constant (white) for wavelengths shorter than about 600  
677 nm (25, 93). A computational model based on an electron micrograph of the tracheolar  
678 tapetum shows that this "chirped" set of layers functions as a broadband reflecting

679 interference filter exhibiting a computed reflectance greater than 90% for wavelengths  
680 between 320 and 680 nm, thereby justifying the assumption of a white reflectance  
681 spectrum in that band. This property of wideband white tapetal reflectance can be  
682 exploited to computationally estimate rhodopsin contents. It is most valuable when  
683 applied after  $\lambda_{\max}$  of UV, blue, and LW rhodopsins have been determined from *in vivo*  
684 photochemistry (Fig. 1; Fig. 2A) and optophysiology (Fig. 2B). R360, R440, and R565  
685 have been determined in *E. atala* (Fig. 2C-D).

686 The procedure is sequential. First, a reflectance spectrum was measured after all  
687 metarhodopsins had decayed from the rhabdoms, e.g., after overnight dark-adaptation  
688 (black filled circles). Next, the dark spectrum was stripped of round-trip optical density  
689 (OD) 1.50 (*male, m*) or 1.00 (*female, f*) of R565 rhodopsin so that the residual spectra  
690 (red lines) were flat from 570 nm out to the 690 nm roll-off of tapetal reflectance. Next,  
691 those residual spectra were stripped of OD 0.36 (*m*) and 0.22 (*f*) of R440 (cyan lines),  
692 leaving large dips in the blue-green around 500 nm that were poorly fit by a single blue  
693 opsin. However, stripping of OD 0.72 (*m*) and 0.55 (*f*)  $\lambda_{\max}$  395 (Retinal Binding Protein,  
694 RBP) left UV residues (magenta lines) well fit by density of 0.55 (*m*) and 0.55 (*f*) of R360.  
695 The remaining residuals (blue lines) were subjected to least-squares fitting to the  
696 rhodopsin template (Fig. 2E), which produced excellent R495 fits of 0.39 (*f*) and 0.70  
697 (*m*), supporting the presence of the fourth rhodopsin, R495.

698 The spectral sensitivities of *Arholopa*, *Celastrina* and *Callophrys* rhodopsins were  
699 investigated using the same techniques as described in SI methods.

700

#### 701 *De novo E. atala eye transcriptome*

702 The heads of 10 adult males (1 day old) were dissected under ambient light with their  
703 antennae and palpi removed prior to flash freezing in liquid nitrogen. Total RNA was  
704 extracted using the Direct-zol RNA extraction kit (Zymoresearch, CA, USA). Illumina  
705 paired-end libraries were constructed using the Ultra II RNA Directional kit (New England  
706 Biolabs, USA) and sequenced with an Illumina HiSeq v4. Adaptors were removed using  
707 Trimgalore (94) and low quality reads were filtered out prior to generating a *de novo*  
708 assembly reference transcriptome for all libraries in the Trinity sequence assembly and

709 analysis pipeline (95). This assembly resulted in 301656 transcripts with a contig N50 of  
710 2519 bp, and average contig lengths of 1029 bp. Small fragments were filtered out  
711 based on expression values using Kallisto (96). Opsin sequences from two other  
712 lycaenids (41) were used as queries to identify all opsin mRNAs across tissues in the  
713 final assembly using BLAST (97). To confirm their identity, the candidate opsin  
714 sequences were blasted back to the NCBI non-redundant database.

#### 715 *Lycaenid LW opsin cDNA characterization*

716 RNA was extracted from eye tissue preserved in RNA shield reagent (Zymo Research)  
717 for *A. japonica*, *Ce. ladon* and *Ca. sheridanii*. Samples were first removed from the  
718 storage solution with sterile forceps, briefly blot dried on a sterile Kimwipes paper, flash  
719 frozen in a mortar containing liquid nitrogen and finely ground using a cold pestle.  
720 Following RNA purification, we quantified RNA using a Quant-iT RNA kit and a Qubit  
721 fluorometer (Invitrogen). From purified RNA, we synthesized cDNA using the The  
722 GoScript™ Reverse Transcription System (Promega) and amplified a central region of  
723 the long-wavelength opsin using degenerated oligonucleotide primers 5'-  
724 TTGAAGCTTCARTTYCCNCCNATGAAYCC-3' (forward) and 5'-CGAATTCGTCAT  
725 RTTNCCYTCIGGNACRTA-3' (reverse) (48). Single bands of expected sizes were  
726 obtained, and the PCR products were purified with Exo-SAP, following Sanger  
727 sequencing. We thereafter used the SMARTer RACE cDNA Amplification kit (Clontech)  
728 to prepare 5'- and 3'- RACE cDNA for each species. We carried out RACE PCRs, and to  
729 increase the specificity of RACE reactions, we performed nested PCRs for each cDNA  
730 and obtained single-band PCR products, which were gel-purified using a Qiaquick Gel  
731 Extraction Kit (Qiagen), ligated into PCR2.1 Vector kit (Invitrogen) and transformed into  
732 competent TOPO10 cells (Invitrogen). Single bacterial clones were purified, and plasmid  
733 DNAs were sequenced using M13F and M13R primers at the Harvard DF/HCC DNA  
734 Resource Core. In total we obtained sequences from 5 to 10 opsin clones for each  
735 RACE cDNA. Based on the 5'- and 3'-UTR information, gene-specific primers were  
736 designed and used in combination with respective eye cDNAs to confirm the integrity of  
737 each full-length LW opsin coding frame sequence. Opsin subfamily phylogenetic  
738 placements were confirmed by aligning selected lepidopteran opsin genes extracted

739 from Genbank using the MAFFT package as implemented in Geneious (98), and a  
740 Neighbor-Joining (NJ) tree of the aligned dataset was constructed using RAxML (99).

741

#### 742 *Cloning and protein expression*

743 The coding region of each opsin transcript was amplified from eye cDNA and subcloned  
744 in a modified pFRT-TO expression vector cassette derived from pcDNA5 and containing  
745 the human cytomegalovirus (CMV) immediate early promoter (Invitrogen, USA). The  
746 expression plasmid was modified to include a C-terminal tag by the monoclonal antibody  
747 FLAG epitope sequence (DYKDDDDK), followed by a Ser-Gly-Ser linker peptide, a T2A  
748 peptide sequence (EGRGSLTTCGDVEENPG) and the fluorescent marker protein  
749 mRuby2. Plasmid DNAs were verified by Sanger sequencing and purified with the endo-  
750 free ZymoPURE™ II Plasmid Midiprep Kit (Zymo Research, USA). Two micrograms of  
751 plasmid DNAs were used to transfect small-scale HEKT293 cultures and optimize  
752 expression conditions both via mRuby2 visualization and western blot analysis. Cells  
753 were plated at a density of  $0.6 \times 10^6$  cells in a 6-well culture dish containing DMEM  
754 medium (Gibco), and transient transfection was achieved after 48h when reaching 80%  
755 confluency in a 1:3 ratio DNA ( $\mu\text{g}$ ): PEI ( $\mu\text{L}$ ) (Polysciences, USA) at 1mg/mL in  
756 molecular grade water, filter-sterilized at  $0.22 \mu\text{m}$ . The transfected cells were harvested  
757 in cold D-PBS (Sigma-Aldrich) after 2 days, centrifuged at  $4^\circ\text{C}$  for 5 min at 4000 rpm,  
758 and resuspended in 50  $\mu\text{L}$  Ripa lysis buffer (Invitrogen) supplemented with 1% n-  
759 Dodecyl  $\beta$ -D-maltoside (Sigma-Aldrich). Cell membranes were lysed for 1h at  $4^\circ\text{C}$  with  
760 gentle rotation on a sample homogenizer, and cell debris collected by centrifugation at  
761  $4^\circ\text{C}$  for 15 min at 13,000 rpm. The crude protein lysate concentration was quantified by  
762 BSA (Sigma-Aldrich) and 25  $\mu\text{g}$  crude extract was loaded on NuPAGE™ 3-8% Tris-  
763 Acetate gels (ThermoFisher) and transferred to a polyvinylidene difluoride membrane on  
764 a TurboBlotTransfer system (Biorad Laboratories). The membranes were blocked with  
765 1% milk (Biorad) in phosphate-buffered saline containing 0.1% Tween 20 (PBS-T,  
766 Biorad) and incubated overnight with primary antibodies (aFLAG 1:2,500, aHSP90  
767 1:50,000, GE Healthcare) containing 0.01% Sodium azide (Sigma Aldrich) on a gently  
768 rocking platform at  $4^\circ\text{C}$ . After washing with TPBS the membranes incubated with aFLAG  
769 and aHSP90 were respectively incubated with HRP Conjugated ECL anti-mouse and

770 ECL anti-rabbit (Amersham, USA), revealed using the SuperSignal West Femto (Thermo  
771 Scientific) and imaged on a ChemiDoc system (Biorad Laboratories).

772

773 *Transient expression, purification of expressed rhodopsins and spectroscopy*

774 High-expressing clones from GPCR opsin cDNAs were transiently expressed in  
775 HEKT293 cells prior to *in vitro* purification. For each construct, cells were seeded at a  
776 density of  $1.0 \times 10^6$  cells on day 0 in fifteen tissue culture dishes (10 cm diameter, ref  
777 25382-166, VWR) in DMEM High Glucose, GlutaMAX (Life Technologies) supplemented  
778 with 10% FBS (Seradigm Premium, VWR, USA). Lipid complexes containing 24  $\mu\text{g}$   
779 DNA: 72  $\mu\text{L}$  PEI (1mg/mL) diluted in Opti-MEM I Reduced Serum (Life Technologies)  
780 were added 48h later to cells reaching 75-85% confluency. Six-hours post-transfection,  
781 the culture medium was exchanged with new medium containing  $5 \mu\text{mol}^{-1}$  11-*cis*-retinal  
782 (2mg/mL stock in 95% Ethanol) and under dim red illumination. The *cis*-retinal  
783 absorption peak at 380 nm was confirmed using a NanoDrop™ 2000/2000c UV-VIS  
784 Spectrophotometer (Thermo Fisher) prior to each experiment using a 1:100 dilution in  
785 ethanol. Culture plates supplemented with *cis*-retinal were wrapped in aluminium foil and  
786 cells were incubated in the dark. Forty-eight hours post-transfection, the medium was  
787 decanted under dim red light illumination. Cells were scraped from the plates in cold  
788 filter-sterilized HEPES wash buffer (3mM  $\text{MgCl}_2$ , 140mM NaCl, 50mM HEPES pH6.6-8.5  
789 depending on protein isoelectric point) containing complete EDTA-free protein inhibitors  
790 (Sigma-Aldrich), centrifuged for 10 min at 1,620 rcf at 4°C, and resuspended in 10 mL  
791 wash buffer for two consecutive washes. After the second wash, cell pellets were gently  
792 resuspended in 10mL cold wash buffer containing 40  $\mu\text{M}$  11-*cis*-retinal. Cells expressing  
793 opsin-membrane proteins were incubated in the dark during 1h at 4°C on a nutating  
794 mixer (VWR) to increase active rhodopsin complexes, and cells were then collected by  
795 centrifugation at 21,500 rpm for 25 min at 4°C on a Sorvall WX Ultra 80 Series equipped  
796 with an AH-629 Swinging Bucket Rotor (Thermo Scientific).

797 Transmembrane proteins were gently extracted by pipetting in 10 mL ice-cold extraction  
798 buffer (3mM  $\text{MgCl}_2$ , 140mM NaCl, 50mM HEPES, 20% Glycerol v/v, 1% n-dodecyl  $\beta$ -D-  
799 maltoside, complete EDTA-free protein inhibitors) and incubated for 1h at 4°C prior to

800 centrifugation at 21,500 rpm for 25 min at 4°C. The 10mL crude extract supernatant  
801 containing solubilized rhodopsin complexes was added to 1mL Pierce™ Anti-  
802 DYKDDDDK Affinity Resin (Thermo Scientific, USA) and incubated overnight at 4°C in a  
803 15mL falcon on a nutating mixer. Samples were loaded on Pierce™ Centrifuge Columns  
804 (ref 89897, Thermo Scientific, USA) and after 3 washes of the resin-bound FLAG-  
805 epitope rhodopsin complexes with 3-column reservoir volumes of elution buffer (3mM  
806 MgCl<sub>2</sub>, 140mM NaCl, 50mM HEPES, 20% Glycerol v/v, 0.1% n-dodecyl β-D-maltoside),  
807 the rhodopsin was eluted in 2mL elution buffer containing 1.25 mg (265 μM) Pierce™ 3x  
808 DYKDDDDK Peptide (Thermo Scientific, USA). The eluate was concentrated using an  
809 Amicon Ultra-2 Centrifugal Filter Unit with Ultracel-10 membrane (Millipore, USA), for 35  
810 min at 4°C and 3,500rpm. The concentrated eluate (~350μL) was aliquoted in Amber  
811 light-sensitive tubes (VWR, USA) and kept on ice in the dark. Ultraviolet-visible  
812 absorption spectra (200-800nm) of dark-adapted purified proteins were measured in the  
813 dark from 1.5 uL aliquots using a NanoDrop™ 2000/2000c UV-VIS spectrophotometer  
814 (Thermo Fisher). Opsin purification yields were estimated following BSA analysis (Table  
815 S23, SI methods). Spectroscopic analysis was performed from the mean value of 4-6  
816 independent spectral measurements. Raw absorbance data were fitted to a visual  
817 template (100) and polynomial functions analyses performed in R (V.0.99.486) (101)to  
818 determine the opsin maximal absorption peaks.

819

#### 820 *Preparation of RNA probes and RNA in situ hybridization*

821 We created *in vitro* transcription templates from UVRh, BRh1, BRh2, LWRh opsin  
822 complementary DNA cloned in approximately 700-base-pair (bp) segments to pCRII-  
823 TOPO (Invitrogen). Antisense cRNA probes were synthesized using T7 or Sp6  
824 polymerases using either digoxigenin (DIG) or fluorescein (FITC) labelling mix (Sigma-  
825 Aldrich) from gel-purified PCR templates. The synthesized cRNA probes were ethanol-  
826 precipitated with NH<sub>4</sub>OAc 7.5M and 1 μL glycogen, spun down at 4°C for 30 min, re-  
827 dissolved in pure water and stored at -80°C. These RNA probes were first used to test  
828 mRNA expression for each opsin receptor gene. We then tested the probes by dual  
829 colour *in situ* hybridization using combinations of DIG and FITC probes to map opsin  
830 receptor expression patterns.

831 For *in situ* hybridization, *E. atala* compound eyes were dissected and immersed in 1.5mL  
832 eppendorf tubes containing freshly-made 4% formaldehyde (FisherScientific)/1x PBS for  
833 2h at room temperature for fixation, then immersed successively in increasing sucrose  
834 gradient solutions (10%, 20%, 30% in PBS) for 1h each, stored in 30% sucrose solution  
835 overnight at 4°C, briefly transferred in OCT:sucrose 1:1, embedded in OCT (Tissue-Tek)  
836 and frozen in dry ice. Tangential and longitudinal eye sections (12  $\mu$ m) were obtained  
837 using a cryostat (Leica), mounted on VWR Superfrost Plus Micro slides and used for  
838 RNA *in situ* hybridization following a procedure described in details previously (102).  
839 Double fluorescence *in situ* hybridization was performed using 100  $\mu$ l hybridization  
840 solution (pre-hybridization buffer supplemented with 4% Dextran sulfate (Sigma)  
841 containing a combination of two opsin cRNA probes, one labeled with DIG and one  
842 labeled with FITC (at 1ng. $\mu$ l<sup>-1</sup> for UVRh and BRh2, and 0.5ng. $\mu$ l<sup>-1</sup> for BRh1 and LWRh).

#### 843 *Eye anatomy*

844 Each *E. atala* eye was immersed for prefixation in 2.5% Glutaraldehyde/2%  
845 paraformaldehyde in 0.1M Sodium Cacodylate buffer (pH 7.4) (Electron Microscopy  
846 Sciences, PA, USA) for 2h at room temperature, then stored at 4°C for 12-14h prior to  
847 fixation, embedding, ultrathin sectioning and mounting on copper grids for TEM analysis  
848 as described in SI methods.

849

#### 850 *Homology modeling and targeted mutagenesis*

851 To investigate the molecular basis of spectral tuning differences between the duplicated  
852 blue visual opsins, we carried out site-directed mutagenesis of amino acid substitutions  
853 that could contribute to possible changes in the maximal absorption spectra of dark-  
854 adapted rhodopsins. First, the Eat-B1 ( $\lambda_{\max}$  = 435nm) and Eat-B2 ( $\lambda_{\max}$  = 500nm) opsin  
855 amino acid sequences were uploaded to the SWISS-MODEL protein recognition engine  
856 (103) to generate templates aligned against the invertebrate squid rhodopsin crystal  
857 structure (PDB2Z73) (72). The predicted homology model for each blue opsin was  
858 analyzed in Pymol (104) to identify homologous binding sites in the *cis*-retinal binding  
859 pocket within a range of 5Å from any carbon in the retinal polyene chain. Of the 101  
860 amino acid substitutions that differ between the duplicate opsins, 21 residues were



861 predicted to interact with the *cis*-retinal chromophore, with 6 variant sites between both  
862 opsin sequences.

863 Amino acid sequences from blue opsins were retrieved from Genbank and aligned using  
864 the MAFFT package followed by NJ tree inference and support analysis derived from  
865 1,500 bootstrap replicates in Geneious (97) prior to visualization in EvolView (98) with  
866 squid rhodopsin as the outgroup. The phylogeny was used to identify functionally  
867 convergent amino acid replacements repeatedly associated with similar shifts in  
868 absorption spectra between blue opsin duplicates. We identified amino acid positions  
869 that were likely to reside within the chromophore binding pocket of the opsin protein, and  
870 that also had diverging biochemical properties (charge and/or polarity).. A BRh1 plasmid  
871 DNA construct was modified to incorporate variant positions found in BRh2, namely  
872 A116S (S1), I120F (S2), G175S (S3), Y177F (S4), I206C (S5), and F207C (S6).

873 Chimeric BRh1 rhodopsin constructs bearing single variant sites located on helix 3 (S1,  
874 S2) and the  $\beta$ -strand located between helices 3 and 4 (S3, S4) were purified and  
875 analyzed by spectroscopy in the native dark state. Since only S1 and S4 had tuning  
876 effects in the range of interest, we combined coevolving adjacent site variants S1/S2,  
877 and S3/S4 and followed two distinct routes by successively adding variant sites creating  
878 triple mutants. Starting from a green-shifted BRh1 variant carrying S5 and S6, a third  
879 trajectory was studied where variant sites S1, S2, S4 were also successively added.

880

### 881 *Wing reflectance*

882 Reflectance spectra were measured from leaves of *Zamia integrifolia* leaves (Zamiaceae)  
883 collected at the Montgomery Botanical Garden (Miami, FL, USA), and from *E. atala*  
884 discrete wing, thorax, and abdominal patches of coloured-scales from both males and  
885 females ( $N_{\text{individuals}}=3-5$ , 2 to 4 measurements per scale type, SI datafile 2), and in a Leitz  
886 Ortholux-Pol microscope equipped with a Leitz MPV-1 photometer with epi-illumination  
887 block, fitted with a Leitz 5.6X/0.15P objective. The illuminator filled the back focal plane  
888 of the objective with axial incident light. The photometer measured reflected light from  
889 the full aperture of the objective from a spot in the front focal plane that was 210  $\mu\text{m}$  in  
890 diameter. Reflectance data were corrected for stray light by subtracting data measured

891 from the MSP objective viewing a light-dump comprised of substantially out-of-focus  
892 black velvet cloth. Corrected reflectance data were normalized against the same  
893 normalization constant of 0.179 to preserve relative brightnesses among all measured  
894 body patches. Normalized reflectance data were analyzed in R (V.0.99.486) (101).

895

#### 896 **Data accessibility**

897 Our sequencing data have been deposited in the GenBank database under accession  
898 numbers MN831881-MN831887 and under SRA Bioproject XXXXX. Data for  
899 photochemistry and optophysiological measurements, opsin absorbance spectra,  
900 reflectance spectra and transcriptomics expression are available as supplementary files.

#### 901 **Competing interests**

902 We declare no competing interests

#### 903 **Acknowledgements**

904 We thank Masaru Hojo for providing eggs, larvae and pupae of *Arhopala japonica*, Maria  
905 Eriksson and Peg Coughin for assistance with electron microscopy, Sara Jones and  
906 Jonathan Schmidt-Burk for advice with cell culture, Ian Slaymaker for advice with protein  
907 purification procedures, Rachel Gaudet and José Velilla for guidance using Pymol and  
908 homology modeling, Rosalie Crouch for providing the 11-cis-retinal, Jeanne Serb and  
909 Davide Faggionato for advice with cis-retinal delivery, Almut Kelber, Mandyam  
910 Veerambudi Srinivasan, Mary Caswell Stoddard, Julien Ayroles, and Riannon Macrae for  
911 helpful discussions and Richard Belliveau, Maggie Starvish and Rachel Hawkins for  
912 providing logistical support. This work was supported by a Mind Brain Behavior  
913 Interfaculty grant to NEP and MAL, an Alice and Knut Wallenberg Postdoctoral  
914 fellowship at the Broad Institute of MIT and Harvard to MAL, a NSF Graduate  
915 Research Fellowship to SSa, personal funds of GDB, and NSF DEB- 1541560 to NEP  
916 and PHY-1411445 to NEP and NY.

917

918 **Figures and Tables**

919

920 **Figure 1. Long-wavelength photochemical difference spectra from lycaenid butterflies.**

921 Difference spectra (DS) were obtained following partial bleaches of long wavelength rhodopsins  
922 from dorsal retina of intact butterflies. Datapoints represent absorbance differences between  
923 amounts of Rhodopsin (R, green or red) and its Metarhodopsin photoproduct (M, blue) product  
924 after a dark-period that followed photoconversion. Each black curve represents a computed  
925 difference spectrum for least square fits estimates at (A) R570 of *Arhopala japonica*, (B) R562 of  
926 *Eumaeus atala* and (C) R518 of *Callophrys sheridanii*. In *E. atala* the difference spectrum was  
927 acquired upon complete degradation of the M photoproduct and with small contributions from  
928 R440 and RBP395. In *Celastrina ladon*,  $\lambda_{\max}$  of M and  $\lambda_{\max}$  of R are very close, which pushed the  
929 DS negative peak to the right. Photographs represent respective butterflies (left) and butterfly  
930 eyeshine (right) in the dorsal retina (see also Fig. S1).

931

932 **Figure 2. In vivo evidence for four rhodopsins in the Atala hairstreak butterfly. (A)**

933 Photochemical analysis of a butterfly male eyeshine using an epi-microspectrophotometer. Log-  
934 reflectance difference absorbance spectra (DS, Difference Spectrum, filled circles) and fitted  
935 curves (solid line) measured from dark-adapted eyes via partial-bleaching experiments of R440.  
936 (B) Optophysiological analyses designed to measure pupillary sensitivity in the UV. The least  
937 squares fit analysis provides confident estimates for a UV rhodopsin with  $\lambda_{\max}$  at 360nm.  
938 Comparison to sensitivities in the blue, driven by R440 and in the red, driven by LW R565  
939 rhodopsins, show that those two opsins make no contributions in the UV. (C-D) Densitometric  
940 analysis of an epi-microspectrophotometric reflectance spectrum of a male (C) and female (D).  
941 Completely dark-adapted *E. atala* eyeshine is used to confirm the contribution of each estimated  
942 visual pigment in the eye. The black dots plot the log-reflectance spectrum. The red curve is the  
943 spectrum after having computationally stripped optical density (OD) 1.50 of rhodopsin with  $\lambda_{\max}$   
944 565 nm so that the residual spectrum is flat from 565 nm to 660 nm; cyan curve, the log-  
945 reflectance spectrum after having stripped OD 0.36 of R440 to produce a residual flat from 450  
946 nm. The black curve is the log-reflectance spectrum after stripping OD 0.72 for R395 and 0.55  
947 R360, leaving a residual spectrum fit by a fourth-rhodopsin R495. The densitometric analysis of  
948 female eyes (D) is qualitatively identical, with stripping densities of 1.55 R565, 0.40 R440, 0.80  
949 RBP395 and 0.55 R350, leaving a residual indicative of a fourth pigment contribution, fit by  
950 rhodopsin R495. Stripping the R495 residual leaves the curve plotted in open squares that is the  
951 putative average log-reflectance spectrum of the tapetum, that is flat from the UV out to 660 nm.  
952 (E) Computational analysis of male residual reflectance spectra supports the contribution of a  
953 fourth opsin pigment with  $\lambda_{\max}$  peaking around 495 nm. The residual fit for females is shown in the

954 inset. (F) Sensitivity data from an optophysiological threshold experiment measured at  
955 wavelengths close to  $\lambda_{\max}$  values (360 nm, 440 nm, 495 nm, 562 nm) of the four rhodopsins. This  
956 shows that sensitivities at 440 nm and 495 nm cannot possibly be driven by R565.

957

958 **Figure 3. Functional characterization of red-shifted long wavelength lycaenid butterfly**  
959 **opsins.** (A) Schematic of modified pCDNA expression vector cassette and workflow for functional  
960 characterization of rhodopsin complexes with cis-retinal chromophore. All steps following addition  
961 of cis-retinal are performed under dim red-light illumination. (B) Neighbour-Joining (NJ) tree of  
962 butterfly long wavelength opsins. Bootstrap node support is as follows: 50-74%, white circle; 75-  
963 94%, grey circle;  $\geq 95\%$ , black circle. Previously published  $\lambda_{\max}$  physiological data are indicated in  
964 parentheses when known (20, 27, 40, 41, 45). Corresponding family names are labeled on the  
965 right. L, T and P correspond to lycaenid subfamilies Lycaeninae, Theclinae and Polyommattinae,  
966 respectively. (C-F) Dark spectra of long wavelength rhodopsin (LWRh) expressed using an  
967 HEKT293 transient cell culture system and purified via FLAG-epitope. LWRh rhodopsin  
968 absorbance spectra are indicated with black dots (Table S7, Dataset S1), and a rhodopsin  
969 template data (100) was computed to obtain the best estimates of  $\lambda_{\max}$  fitting the data. (C)  
970 *Arhopala japonica* purified LW opsin with  $\lambda_{\max} = 570$  nm, (D) *Eumaeus atala* purified LW opsin  
971 with  $\lambda_{\max} = 567$  nm, (E) *Callophrys sheridanii* purified LW opsin with  $\lambda_{\max} = 525$  nm, (F) *Celastrina*  
972 *ladon* purified LW opsin with  $\lambda_{\max} = 525$  nm.

973

974 **Figure 4. Anatomical overview of a typical ommatidium in *Eumaeus atala*.** (A) Diagram  
975 illustrating a typical ommatidium and the relative contribution of nine photoreceptor cells R1-R9 at  
976 different depths along the rhabdom (480  $\mu\text{m}$  long). Photoreceptors R1 and R2 are proximal cells  
977 in region *a* (126  $\mu\text{m}$ ) that contribute microvillar structures containing UVRh, BRh1 and BRh2  
978 rhodopsins. Photoreceptors R3-R4 are proximal receptors containing LWRh and Brh1  
979 rhodopsins. Photoreceptors R5-R8 are distal cells exclusively expressing the LWRh rhodopsin  
980 (see also Fig 4, Fig S2). The basal cell, R9 is restricted to the region immediately proximal to the  
981 basement membrane (460  $\mu\text{m}$ , h). The expressed mRNA opsin type was not investigated in this  
982 cell. (B) Scanning electron micrographs from a male dorsal eye region at 30° elevation across the  
983 rhabdom. Scale bars, 2  $\mu\text{m}$ . (C) Distal microvilli in regions *a*- *b* are exclusively oriented parallel to  
984 the R1-R2 axis (left panel). As R3-R4 cells expand and contribute the majority of microvilli from  
985 regions *c* to *e*, together with novel contributions from proximal receptors R5 to R8, three  
986 ommatidia subtypes are formed that exhibit microvillar contributions parallel to (left panel) but  
987 also intertwined (middle panel) and perpendicular to the R1-R2 axis (right panel). Scale bars, 500

988 nm. *bm*, basement membrane; *rh*, rhabdom; *nc*, nucleus; *tp*, tapetum; *vc*, vacuole; 1-9,  
989 photoreceptor cells R1 to R9.

990 **Figure 5. Adjacent photoreceptor localization between duplicate blue opsin mRNAs drives**  
991 **retinal mosaic expansion.** Double fluorescent *in situ* hybridization shows six ommatidial types in  
992 *E. atala* compared to ancestral butterfly eyes. (A-F) Exclusive one-cell one-mRNA expression  
993 pattern in distal photoreceptors R1 and R2, showing for (A) UVRh (inset in (D)), (B) BRh1 mRNA  
994 (inset in (E)) and (C) BRh2 mRNA (inset in (F)). Circles highlight the four distinct opsin expression  
995 patterns in R1 and R2. (G-I) UVRh, BRh1 and BRh2 mRNAs do not coexpress in R1-R2 cells.  
996 Photoreceptor cells R3-R8 express the LWRh opsin (red). Males and females show dorso-ventral  
997 dimorphism (Fig. S4). (J) Schematic representation of opsin-based photoreceptor classes in  
998 males and females of the six ommatidial types as follows (R1-R2-R3/R8): UV-UV-LW, UV-B1-  
999 LW, UV-B2-LW, B1-B1-LW, B1-B2-LW, B2-B2-LW.

1000 **Figure 6. Residues responsible for spectral tuning shifts in blue rhodopsins.** (A) NJ tree of  
1001 selected lepidopteran blue opsin amino acid sequences. The squid rhodopsin, *Todarodes*  
1002 *pacificus* (acc. nr. CAA49906) is used as outgroup. Bootstrap node support is as follows: 50-74%,  
1003 white circle; 75-94%, grey circle;  $\geq 95\%$ , black circle. Dots above the partial multiple sequence  
1004 alignment shows the 21 amino acid residues residing within 5 Å of any carbon atom in the retinal  
1005 polyene chain. Blue dots identify the six positions where amino acid residues differ between *E.*  
1006 *atala* BRh1 and BRh2, blue rectangles highlight variants at these positions in lycaenids. Residue  
1007 numbering is based on residue position in the squid rhodopsin. Residues are coloured according  
1008 to their physicochemical properties in Jalview v2 (105). Grey arrows indicate  $\beta$ -strands forming  
1009 the binding pocket. (B) Blue opsin absorbance spectra (dots) fitted to the visual template (cyan  
1010 and blue line functions), respectively. (C) Predicted structure for Eat-BRh1 based on homology  
1011 modeling with the squid rhodopsin with variant sites Ala116, Iso120, GLy175, Phe177, Iso206.  
1012 (D) Native Brh1 rhodopsin bearing S1 (A116), S2 (I120) and S4 (Y177). (E) Substituting residues  
1013 116, 120 and 177 leads to a 30-nm partial blue-shift in rhodopsin absorbance  $\lambda_{\max}$  in the triple  
1014 mutant (see also Figure S2). This tuning shift may be mediated by several possible mechanisms  
1015 including additive effects caused by novel hydrogen bond formation at the coevolving adjacent  
1016 sites 116 and 120 (F) and with nearby conserved residues G115 and G121. (G) An alternative  
1017 evolutionary route involves substituting G175S (S3) which partially compensates the green tuning  
1018 shift of double mutant A116S/Y177F (Fig. S6, Table S8) and tunes the absorbance spectrum  
1019 near 500nm. These alternative trajectories highlight additive and epistatic interactions between  
1020 four residues at sites 1-4 (F, H) in the acquisition of the blue-shifted function.

1021

1022 **Figure 7. Wing and body spectral reflectance in *Eumaeus atala*.** (A) Female (F) and male (M)  
1023 dorsal forewing (DFW), ventral hindwing (VHW), thorax and abdominal scales. The photographs  
1024 below each wing are magnified views of representative coloured wing scales in patches  
1025 measured by epi-microspectrophotometry (MSP). The field of view for each photograph is 210  $\mu\text{m}$   
1026 in diameter. Photographs were acquired using an Olympus TG-1 camera set at zoom 2.8. (B-C)  
1027 Graphs of mean reflectance spectra  $\pm$  standard errors of the mean of wing scale patches (B) and  
1028 body scales (C) (N=3-5 individuals per sex). (D) Leaf reflectance spectra (4-5 measurements per  
1029 leaf surface) (SI Datafile 2). (E) *E. atala* rhodopsin absorbance spectra. Male and female wing  
1030 reflectance spectra are not exclusive, and spectral shapes are highly consistent indicating that  
1031 male and female spectra are similar in the visible. In females, hindwing cyan spots show a  
1032 reflectance peak at 540 nm (B). Blue scales on the thorax and dorsal forewings have a  
1033 reflectance peak at 490-500 nm. Hindwing (B) and abdominal red patches (C) have identical high  
1034 reflectance spectra at long wavelengths in both sexes. MSP analyses from black areas of ventral  
1035 hindwings (B) showed that black scales are only 1 % as reflective as adjacent cyan scales in the  
1036 blue/green band. Brightness in black regions decreases 100-fold compared to adjacent cyan  
1037 scales in both sexes. All reflectance curves overlap at contributing wavelengths for at least two  
1038 rhodopsins, thereby efficiently distinguishing foliage and sex-specific wing colour patterns.

1039 **References**

- 1040 1. M. Lynch, J. S. Conery, The evolutionary fate and consequences of duplicate genes. *Science*  
1041 **290**, 1151-1155 (2000).
- 1042 2. H. Kaessmann, Origins, evolution, and phenotypic impact of new genes. *Genome research*  
1043 **20**, 1313-1326 (2010).
- 1044 3. M. Long, K. Thornton, Gene duplication and Evolution. *Nature* **293**, 1551a (2001).
- 1045 4. J. Zhang, Evolution by gene duplication: an update. *Trends in Ecology & Evolution* **18**, 292-  
1046 298 (2003).
- 1047 5. M. A. Liénard, H.-L. Wang, J.-M. Lassance, C. Löfstedt, Sex pheromone biosynthetic  
1048 pathways are conserved between moths and the butterfly *Bicyclus anynana*. *Nat Comms* **5:3957**  
1049 (2014).
- 1050 6. R. Feuda, F. Marlétaz, M. A. Bentley, P. W. H. Holland, Conservation, Duplication, and  
1051 Divergence of Five Opsin Genes in Insect Evolution. *Genome biology and evolution* **8**, 579-587  
1052 (2016).
- 1053 7. P. Brand *et al.*, The evolution of sexual signaling is linked to odorant receptor tuning in  
1054 perfume-collecting orchid bees. *Nature Communications* **11**, 244 (2020).
- 1055 8. M. Chapal, S. Mintzer, S. Brodsky, M. Carmi, N. Barkai, Resolving noise-control conflict by  
1056 gene duplication. *PLOS Biology* **17**, e3000289 (2019).
- 1057 9. M. Soskine, D. S. Tawfik, Mutational effects and the evolution of new protein functions. *Nature*  
1058 *Reviews Genetics* **11**, 572-582 (2010).
- 1059 10. J. Zhang, Y. Zhang, H. Rosenberg, Adaptive evolution of a duplicated pancreatic  
1060 ribonuclease gene in a leaf-eating monkey. *Nature Genetics* **30**, 411-415 (2002).
- 1061 11. G. M. Castiglione, B. S. W. Chang, Functional trade-offs and environmental variation shaped  
1062 ancient trajectories in the evolution of dim-light vision. *eLife* **7**, e35957 (2018).
- 1063 12. M. Manceau, V. Domingues, C. Linnen, E. Rosenblum, H. Hoekstra, Convergence in  
1064 pigmentation at multiple levels: mutations, genes and function. *Philos Trans R Soc Lond B Biol*  
1065 *Sci* **365**, 2439-2450 (2010).
- 1066 13. S. B. Carroll, Evolution at Two Levels: On Genes and Form. *PLOS Biology* **3**, e245 (2005).
- 1067 14. F. Hauser, B. Chang, Insights into visual pigment adaptation and diversity from model  
1068 ecological and evolutionary systems. *Current opinion in genetics & development* **47**, 110-120  
1069 (2017).
- 1070 15. A. Terakita, The opsins. *Protein family review* **6**, 213 (2005).
- 1071 16. S. Yokoyama, Evolution of Dim-Light and Color Vision Pigments. *Annu Rev Genom Hum G*  
1072 **9**, 259-282 (2008).
- 1073 17. D. E. Nilsson, M. F. Land, J. Howard, Optics of the butterfly eye. *Journal of Comparative*  
1074 *Physiology A* **162**, 341-366 (1988).
- 1075 18. A. D. Briscoe, L. Chittka, The evolution of color vision in insects. *Ann Rev Entomol* **46**, 471-  
1076 510 (2001).
- 1077 19. G. Bernard, C. Remington, Color vision in *Lycaena* butterflies: spectral tuning of receptor  
1078 arrays in relation to behavioral ecology. *Proc Nat Acad Sci USA* **88**, 2783-2787 (1991).
- 1079 20. F. Frentiu, G. Bernard, M. Sison-Mangus, A. Van Zandt Brower, A. Briscoe, Gene Duplication  
1080 Is an Evolutionary Mechanism for Expanding Spectral Diversity in the Long-Wavelength  
1081 Photopigments of Butterflies. *Mol Biol Evol* **24**, 2016-2028 (2007).
- 1082 21. A. D. Briscoe *et al.*, Positive selection of a duplicated UV-sensitive visual pigment coincides  
1083 with wing pigment evolution in *Heliconius* butterflies. *PNAS* **107**, 3628-3633 (2010).
- 1084 22. D. Armisén *et al.*, The genome of the water strider *Gerris buenoi* reveals expansions of gene  
1085 repertoires associated with adaptations to life on the water. *BMC Genomics* **19**, 832 (2018).
- 1086 23. C. R. Sharkey *et al.*, Overcoming the loss of blue sensitivity through opsin duplication in the  
1087 largest animal group, beetles. *Scientific Reports* **7**, 8 (2017).
- 1088 24. H. Koshitaka, M. Kinoshita, M. Vorobyev, K. Arikawa, Tetrachromacy in a butterfly that has  
1089 eight varieties of spectral receptors. *Proc Biol Sci* **275**, 947-954 (2008).

- 1090 25. F. D. Frentiu *et al.*, Adaptive evolution of color vision as seen through the eyes of butterflies.  
1091 *PNAS* **104**, 8634-8640 (2007).
- 1092 26. R. Futahashi *et al.*, Extraordinary diversity of visual opsin genes in dragonflies. *PNAS* **112**,  
1093 E1247 (2015).
- 1094 27. M. Wakakuwa *et al.*, Evolution and Mechanism of Spectral Tuning of Blue-Absorbing Visual  
1095 Pigments in Butterflies. *PLOS ONE* **5**, e15015 (2010).
- 1096 28. F. E. Hauser, I. v. Hazel, B. S. W. Chang, Spectral tuning in vertebrate short wavelength-  
1097 sensitive 1 (SWS1) visual pigments: Can wavelength sensitivity be inferred from sequence data?  
1098 *J Exp Zool* **322**, 529-539 (2014).
- 1099 29. M. Perry *et al.*, Molecular logic behind the three-way stochastic choices that expand butterfly  
1100 colour vision. *Nature* **535**, 280-284 (2016).
- 1101 30. A. D. Briscoe, Reconstructing the ancestral butterfly eye: focus on the opsins. *J Exp Biol* **211**,  
1102 1805-1813 (2008).
- 1103 31. K. Arikawa, The eyes and vision of butterflies. *J Physiol* **595**, 5457-5464 (2017).
- 1104 32. G. H. Jacobs, Primate photopigments and primate color vision. *Proceedings of the National*  
1105 *Academy of Sciences* **93**, 577 (1996).
- 1106 33. M. Luehrmann *et al.*, Short-term colour vision plasticity on the reef: changes in opsin  
1107 expression under varying light conditions differ between ecologically distinct fish species. *The*  
1108 *Journal of Experimental Biology* **221**, jeb175281 (2018).
- 1109 34. G. H. Jacobs, Evolution of colour vision in mammals. *Philos Trans R Soc B* **364**, 2957-2967  
1110 (2009).
- 1111 35. Y. Shichida, T. Matsuyama, Evolution of opsins and phototransduction. *Philos Trans R Soc B*  
1112 **364**, 2881 (2009).
- 1113 36. A. Gutierrez Eduardo de *et al.*, The role of ecological factors in shaping bat cone opsin  
1114 evolution. *Proc Biol Sci* **285** (2018).
- 1115 37. A. Monteiro, Origin, Development, and Evolution of Butterfly Eyespots. *Annual Review of*  
1116 *Entomology* **60**, 253-271 (2015).
- 1117 38. K. Dasmahapatra *et al.*, Butterfly genome reveals promiscuous exchange of mimicry  
1118 adaptations among species. *Nature* **487**, 94-98 (2012).
- 1119 39. N. P. Lord *et al.*, A cure for the blues: opsin duplication and subfunctionalization for short-  
1120 wavelength sensitivity in jewel beetles (Coleoptera: Buprestidae). *BMC Evolutionary Biology* **16**,  
1121 107 (2016).
- 1122 40. M. P. Sison-Mangus, A. D. Briscoe, G. Zaccardi, H. Knüttel, A. Kelber, The lycaenid butterfly  
1123 *Polyommatus icarus*; uses a duplicated blue opsin to see green. *Journal of Experimental Biology*  
1124 **211**, 361 (2008).
- 1125 41. M. P. Sison-Mangus, G. D. Bernard, J. Lampel, A. D. Briscoe, Beauty in the eye of the  
1126 beholder: the two blue opsins of lycaenid butterflies and the opsin gene-driven evolution of  
1127 sexually dimorphic eyes. *J Exp Biol* **209**, 3079-3090 (2006).
- 1128 42. H. Awata, M. Wakakuwa, K. Arikawa, Evolution of color vision in pierid butterflies: blue opsin  
1129 duplication, ommatidial heterogeneity and eye regionalization in *Colias erate*. *Journal of*  
1130 *Comparative Physiology A* **195**, 401-408 (2009).
- 1131 43. P. Chauhan *et al.*, De novo transcriptome of *Ischnura elegans* provides insights into sensory  
1132 biology, colour and vision genes. *BMC Genomics* **15**, 808 (2014).
- 1133 44. A. Briscoe, Six opsins from the butterfly *Papilio glaucus*: molecular phylogenetic evidence for  
1134 paralogous origins of red-sensitive visual pigments in insects. *Journal of Molecular Evolution* **51**,  
1135 110-121 (2000).
- 1136 45. K. Arikawa, Spectral organization of the eye of a butterfly, *Papilio*. *J Comp Physiol* **189**, 791-  
1137 800 (2003).
- 1138 46. P.-J. Chen, H. Awata, A. Matsushita, E.-C. Yang, K. Arikawa, Extreme Spectral Richness in  
1139 the Eye of the Common Bluebottle Butterfly, *Graphium sarpedon*. *Front Ecol Evol* **4**, 18 (2016).
- 1140 47. G. Pratt, J. Emmel, G. D. Bernard, The Buckwheat Metalmarks. *Am Butterflies* **19**, 4-31  
1141 (2011).



- 1142 48. M. Wakakuwa, D. G. Stavenga, M. Kurasawa, K. Arikawa, A unique visual pigment  
1143 expressed in green, red and deep-red receptors in the eye of the small white butterfly, *Pieris*  
1144 *rapae crucivora*. *J Exp Biol* **207**, 2803-2810 (2004).
- 1145 49. Y. Ogawa, M. Kinoshita, D. G. Stavenga, K. Arikawa, Sex-specific retinal pigmentation  
1146 results in sexually dimorphic long-wavelength-sensitive photoreceptors in the eastern pale  
1147 clouded yellow butterfly, &lt;em&gt;Colias erate&lt;/em&gt;. *The Journal of Experimental Biology*  
1148 **216**, 1916 (2013).
- 1149 50. A. Satoh *et al.*, Red-shift of spectral sensitivity due to screening pigment migration in the  
1150 eyes of a moth, *Adoxophyes orana*. *Zool Lett* **3**, 14 (2017).
- 1151 51. P. Pirihi *et al.*, The giant butterfly-moth *Paysandisia archon* has spectrally rich apposition  
1152 eyes with unique light-dependent photoreceptor dynamics. *Journal of Comparative Physiology A*  
1153 **204**, 639-651 (2018).
- 1154 52. G. Bernard, Red-absorbing Visual Pigment of Butterflies. *Science* **203**, 1125-1127 (1979).
- 1155 53. G. Zaccardi, A. Kelber, M. P. Sison-Mangus, A. D. Briscoe, Color discrimination in the red  
1156 range with only one long-wavelength sensitive opsin. *J Exp Biol* **209**, 1944-1955 (2006).
- 1157 54. G. D. Bernard, Bleaching of rhabdoms in eyes of intact butterflies. *Science* **219**, 69-71  
1158 (1983).
- 1159 55. S. Yokoyama *et al.*, Epistatic Adaptive Evolution of Human Color Vision. *PLOS Genetics* **10**,  
1160 e1004884 (2014).
- 1161 56. M. Neitz, J. Neitz, G. H. Jacobs, Spectral tuning of pigments underlying red-green color  
1162 vision. *Science* **252**, 971 (1991).
- 1163 57. Dulai KS, v. D. M, M. JD, H. DM, *Genome Res* **9**, 629-638 (1999).
- 1164 58. S. Kawamura, Kawamura S. Color vision diversity and significance in primates inferred from  
1165 genetic and field studies. *Genes Genomics*. 2016;38:779–791. doi:10.1007/s13258-016-0448-9.  
1166 *Genes Genomics* **38**, 779-791 (2016).
- 1167 59. A. Kelber, Bird colour vision - from cones to perception. *Current opinion in Behavioral*  
1168 *Sciences* **30**, 34-40 (2019).
- 1169 60. A. Terakita *et al.*, Expression and comparative characterization of Gq-coupled invertebrate  
1170 visual pigments and melanopsin. *J Neurochem* **105**, 883-890 (2008).
- 1171 61. F. Frentiu *et al.*, Clines in butterflies suggest novel roles for insect photopigments. *Mol Biol*  
1172 *Evol* **32**, 368-379 (2014).
- 1173 62. T. Saito *et al.*, Spectral tuning mediated by helix III in butterfly long wavelength-sensitive  
1174 visual opsins revealed by heterologous action spectroscopy. *Zoological Letters* **5**, 35 (2019).
- 1175 63. M. Wakakuwa, F. Stewart, Y. Matsumoto, S. Matsunaga, K. Arikawa, Physiological basis of  
1176 phototaxis to near-infrared light in *Nephotettix cincticeps*. *Journal of Comparative Physiology A*  
1177 **200**, 527-536 (2014).
- 1178 64. A. Kelber, Ovipositing butterflies use a red receptor to see green. *J Exp Biol* **202**, 2619-2630  
1179 (1999).
- 1180 65. R. Cannon, *Courtship and mating in butterflies: reproduction, mating, behaviour and sexual*  
1181 *conflicts*. R. J. C. Cannon, Ed. (Severn, Gloucester, UK, 2020), pp. 376.
- 1182 66. M. Heikkilä, L. Kaila, M. Mutanen, C. Pena, N. Wahlberg, Cretaceous origin and repeated  
1183 tertiary diversification of the redefined butterflies. *Proceedings of the Royal Society of London,*  
1184 *Series B: Biological Sciences* **279**, 1093-1099 (2012).
- 1185 67. M. Espeland *et al.*, A Comprehensive and Dated Phylogenomic Analysis of Butterflies. *Cur*  
1186 *Biol* **28**, 770-778.e775 (2018).
- 1187 68. S. Koi, D. Hall, Atala Butterfly, Atala Hairstreak, Coontie Hairstreak, *Eumaeus atala* Poey  
1188 1832 (Insecta: Lepidoptera: Lycaenidae). (2016).
- 1189 69. A. Myrberg, M. Mohler, J. Catala, Sound production by males of a coral reef fish  
1190 (*Pomacentrus partitus*): its significance to females. *Animal Behaviour* **34** (1986).
- 1191 70. D. Faggionato, J. M. Serb, Strategy to Identify and Test Putative Light Sensitive Non-Op sin  
1192 G-Protein-Coupled Receptors: A Case Study. *Biol. Bull.* **233**, 70-82 (2017).
- 1193 71. J. Morrow, B. Chang, The p1D4-hrGFP II expression vector: A tool for expressing

- 1194 and purifying visual pigments and other G protein-coupled receptors. *Plasmid* **64**, 162-169  
1195 (2010).
- 1196 72. M. Murakami, T. Kouyama, Crystal structure of squid rhodopsin. *Nature* **453**, 363 (2008).
- 1197 73. A. Kelber, L. S. V. Roth, Nocturnal colour vision – not as rare as we might think. *J Exp Biol*  
1198 **209**, 781 (2006).
- 1199 74. J. Fasick, N. Lee, D. Oprian, Spectral tuning in the human blue cone pigment. *Biochemistry*  
1200 **38**, 11593-11596 (1999).
- 1201 75. B. Wilts, H. Leertouwer, D. G. Stavenga, Imaging scatterometry and microspectrophotometry  
1202 of lycaenid butterfly wing scales with perforated multilayers. *J R Soc Interface* **6**, S185-S192  
1203 (2009).
- 1204 76. D. G. Stavenga, H. Leertouwer, P. Pirihi, M. Wehling, Imaging scatterometry of butterfly wing  
1205 scales. *Optics Express* **17**, 193-202 (2009).
- 1206 77. R. Vane-Wright, M. Boppre, Visual and chemical signalling in butterflies: functional and  
1207 phylogenetic perspectives. *Proceedings of the Royal Society B Biological Sciences* **340**, 197-205  
1208 (1993).
- 1209 78. J. A. Fordyce, C. C. Nice, M. L. Forister, A. M. Shapiro, The significance of wing pattern  
1210 diversity in the Lycaenidae: mate discrimination by two recently diverged species. *Journal of*  
1211 *Evolutionary Biology* **15**, 871-879 (2002).
- 1212 79. C. Jiggins, R. Naisbit, R. Coe, J. Mallet, Reproductive isolation caused by colour pattern  
1213 mimicry. *Nature* **411**, 302-305 (2001).
- 1214 80. L. Wilkins, D. Osorio, Object colours, material properties and animal signals. *The Journal of*  
1215 *Experimental Biology* 10.1242/jeb.204487, jeb.204487 (2019).
- 1216 81. J. Schnapf, T. Kraft, D. Baylor, Spectral sensitivity of human cone photoreceptors. *Nature*  
1217 **325**, 439-441 (1987).
- 1218 82. M. Imafuku, I. Shimizu, H. Imai, Y. Shichida, Sexual difference in color sense in a lycaenid  
1219 butterfly, *Narathura japonica*. *Zoolog Sci* **24**, 611-613 (2007).
- 1220 83. D. McCoy, R. Prum, Convergent evolution of super black plumage near bright color in 15 bird  
1221 families. *J Exp Biol* **222**, Pt 18 (2019).
- 1222 84. D. McCoy *et al.*, Structurally assisted super black in colourful peacock spiders. *Proc Biol Sci*  
1223 **286**, 20190589 (2019).
- 1224 85. A. L. Davis, H. F. Nijhout, S. Johnsen, Diverse nanostructures underlie thin ultra-black scales  
1225 in butterflies. *Nature Communications* **11**, 1294 (2020).
- 1226 86. O. Liew, P. Chong, B. Li, A. Asundi, Signature Optical Cues: Emerging Technologies for  
1227 Monitoring Plant Health. *Sensors* **8**, 3205-3239 (2008).
- 1228 87. R. Segalla, F. J. Telles, F. Pinheiro, P. Morellato, A Review of Current Knowledge of  
1229 Zamiaceae, With Emphasis on Zamia From South America. *Tropical Conservation Science*  
1230 *Tropical Conservation Science* **12**, 1-21 (2019).
- 1231 88. M. Rossi *et al.*, Neural processing genes are linked to divergence in visual mate preference  
1232 in sympatric *Heliconius* butterflies. *bioRxiv* 10.1101/2020.03.22.002121, 2020.2003.2022.002121  
1233 (2020).
- 1234 89. D. Osorio, M. Vorobyev, A review of the evolution of animal colour vision and visual  
1235 communication signals. *Vision Research* **48**, 2042-2051 (2008).
- 1236 90. G. D. Bernard, Dark-Processes Following Photoconversion of Butterfly Rhodopsins.  
1237 *Biophysics of Structure and Mechanism* **9**, 277-286 (1983).
- 1238 91. D. G. Stavenga, J. Numan, J. Tinbergen, J. Kuiper, Insect pupil mechanisms. II. Pigment  
1239 migration in retinula cells of butterflies. *J Comp Phys A* **113**, 73-93 (1977).
- 1240 92. G. D. Bernard, "Noninvasive optical techniques for probing insect photoreceptors" in  
1241 Biomembranes Part H: Visual pigments and purple membranes I, *Methods in Enzymology*, P. L.,  
1242 Ed. (Academic Press, New York, 1982), vol. 81, pp. 752-759.
- 1243 93. A. Briscoe, G. D. Bernard, A. Szeto, L. Nagy, R. White, Not all butterfly eyes are created  
1244 equal: Rhodopsin absorption spectra, molecular identification, and localization of ultraviolet-, blue-  
1245 , and green-sensitive rhodopsin-encoding mRNAs in the retina of *Vanessa cardui*. *J Comp Neurol*  
1246 **458**, 334-349 (2003).

- 1247 94. F. Krueger, "Trim galore." A wrapper tool around Cutadapt and FastQC to consistently apply  
1248 quality and adapter trimming to FastQ files. **516**, 517 (2015).
- 1249 95. B. J. Haas *et al.*, De novo transcript sequence reconstruction from RNA-seq using the Trinity  
1250 platform for reference generation and analysis. *Nat Prot* **8**, 1494-1512 (2013).
- 1251 96. N. Bray, H. Pimentel, P. Melsted, L. Pachter, Near-optimal probabilistic RNA-seq  
1252 quantification. *Nature Biotechnology* **34**, 525-527 (2016).
- 1253 97. S. F. Altschul *et al.*, Gapped BLAST and PSI-BLAST: a new generation of protein database  
1254 search programs. *Nucleic Acids Research* **25**, 3389-3402 (1997).
- 1255 98. M. Kearse *et al.*, Geneious Basic: An integrated and extendable desktop software platform  
1256 for the organization and analysis of sequence data. *Bioinformatics* **28**, 1647-1649 (2012).
- 1257 99. A. Stamatakis, RAxML version 8: a tool for phylogenetic analysis and post-analysis of large  
1258 phylogenies. *Bioinformatics* **30**, 1312-1313 (2014).
- 1259 100. A. Palacios, T. Goldsmith, G. D. Bernard, Sensitivity of cones from a cyprinid fish (*Danio*  
1260 *aequipinnatus*) to ultraviolet and visible light. *Vis Neurosci* **13**, 411-421 (1996).
- 1261 101. R. C. Team, R: A language and environment for statistical computing. R Foundation for  
1262 Statistical Computing, Vienna, Austria. URL <https://www.R-project.org/>. (2015).
- 1263 102. Y. Isogai *et al.*, Molecular organization of vomeronasal chemoreception. *Nature* **478**, 241-  
1264 245 (2011).
- 1265 103. A. Waterhouse *et al.*, SWISS-MODEL: homology modelling of protein structures and  
1266 complexes. *Nucleic acids research* **46**, W296-W303 (2018).
- 1267 104. Anonymous (The PyMOL Molecular Graphics System, Version 1.8, Schrödinger, LLC.
- 1268 105. A. M. Waterhouse, J. B. Procter, D. M. A. Martin, M. Clamp, G. J. Barton, Jalview version 2:  
1269 A Multiple Sequence Alignment and Analysis Workbench. *Bioinformatics* **25**, 1189-1191 (2009).

1270

**A**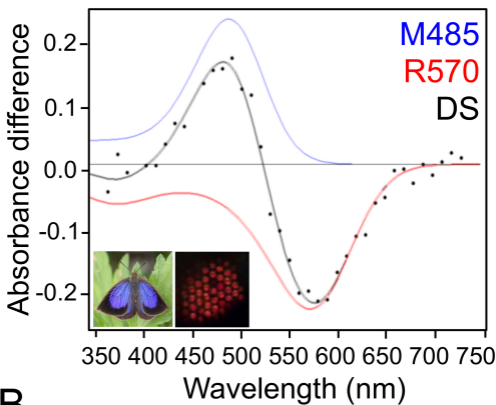**B**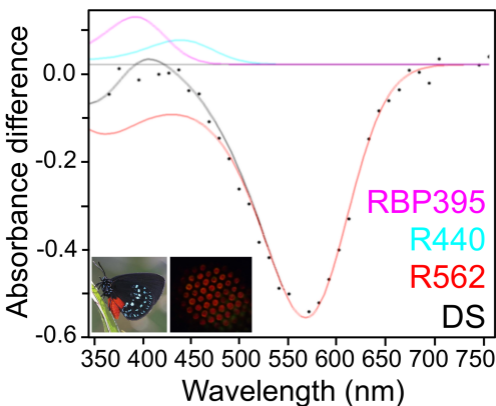**C**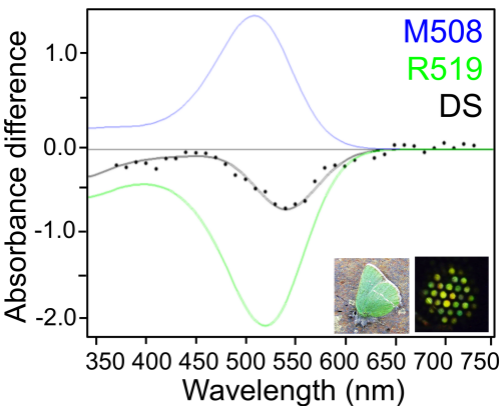

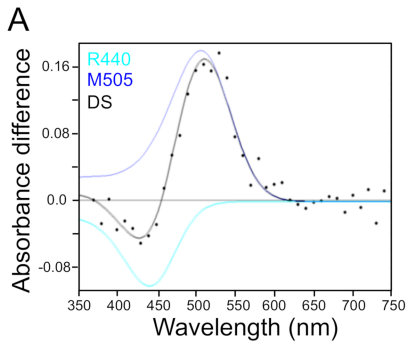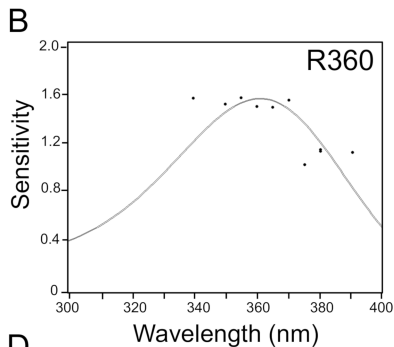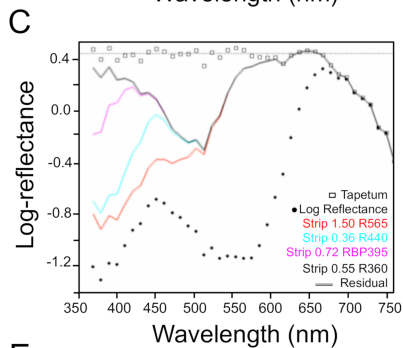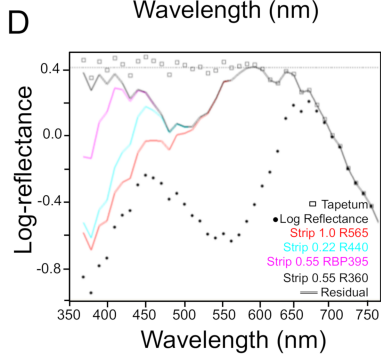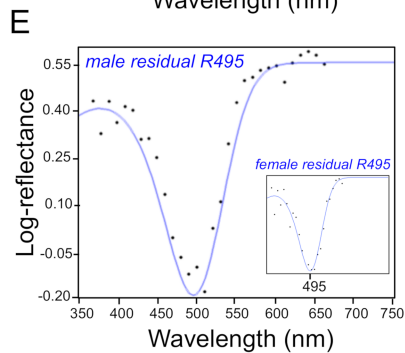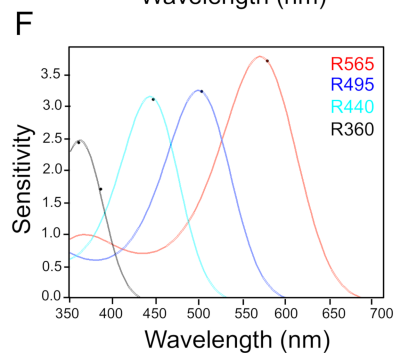

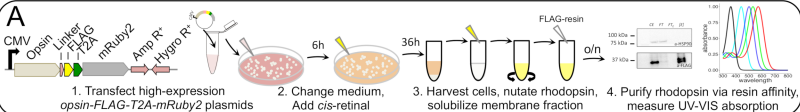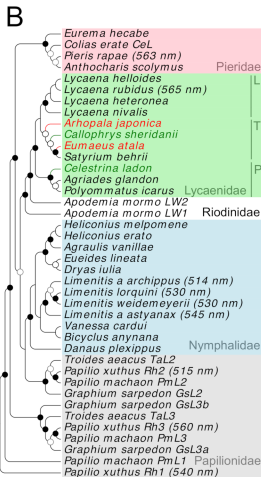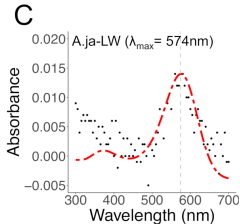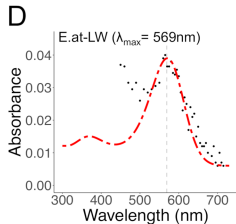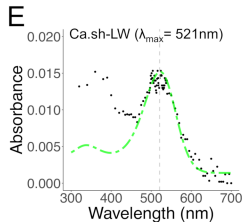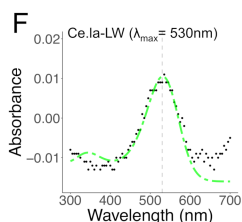

**A**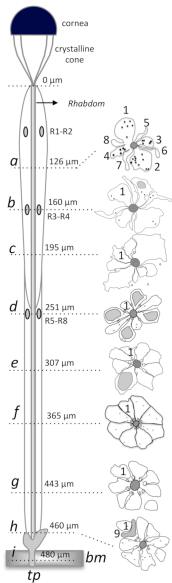**B**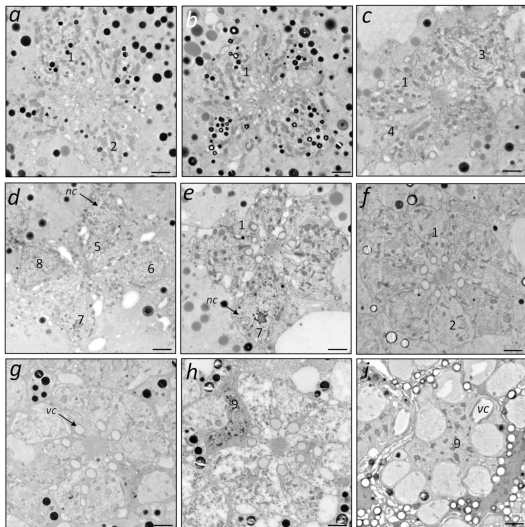**C**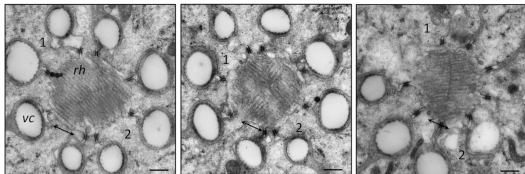

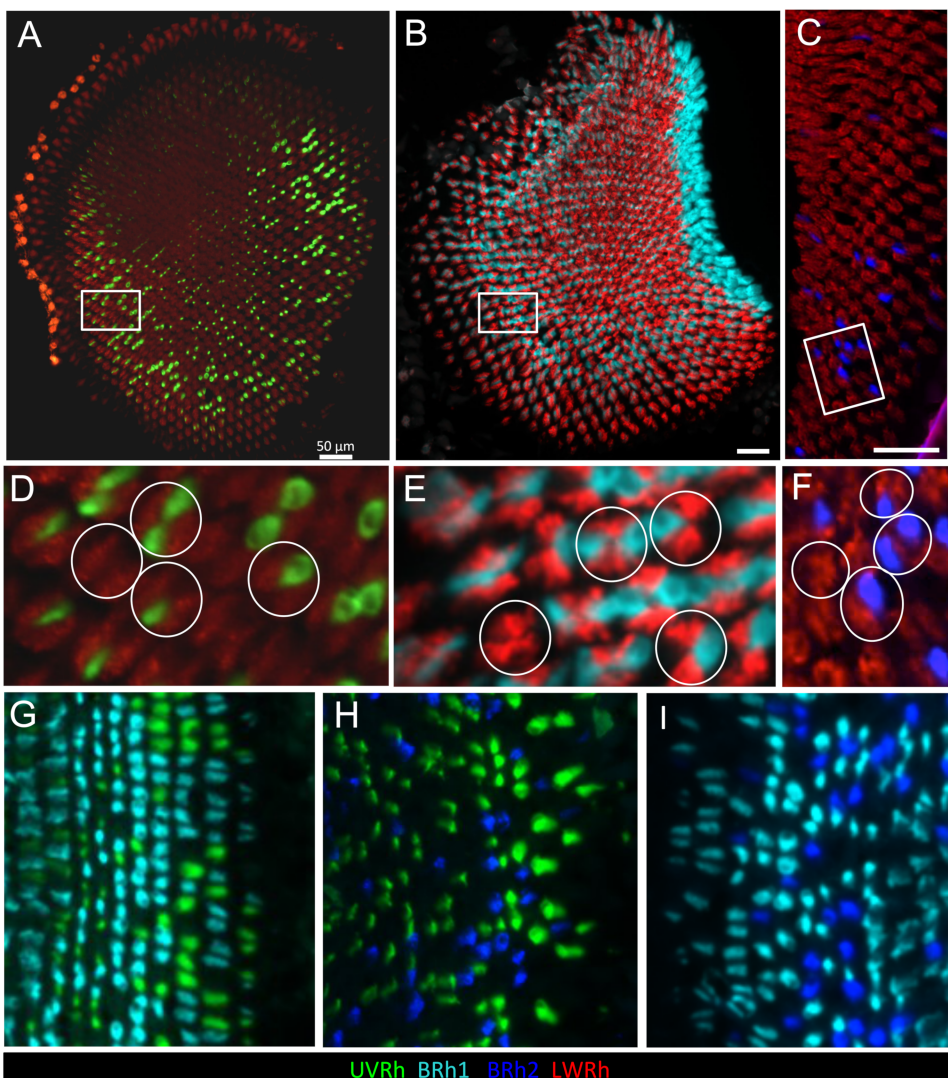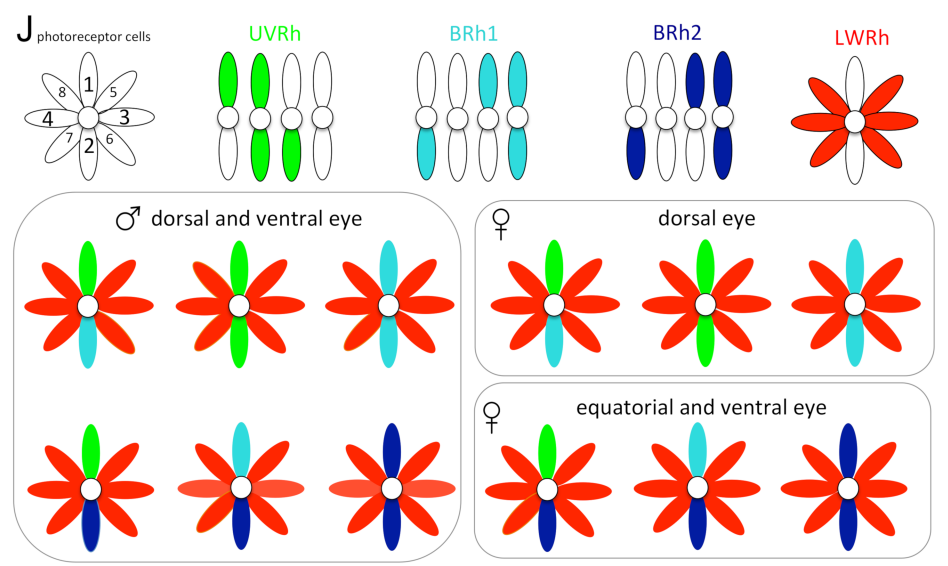



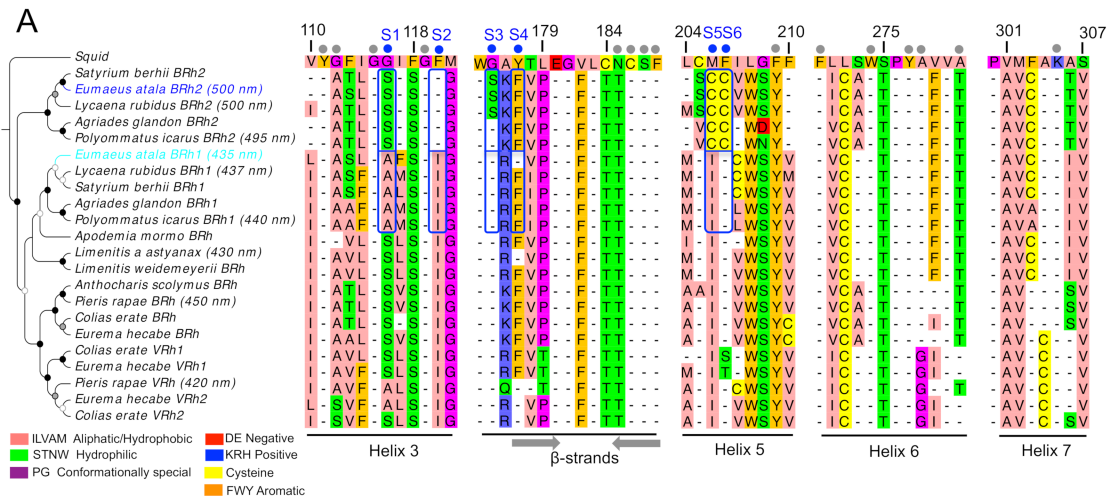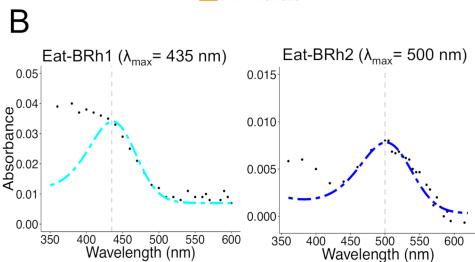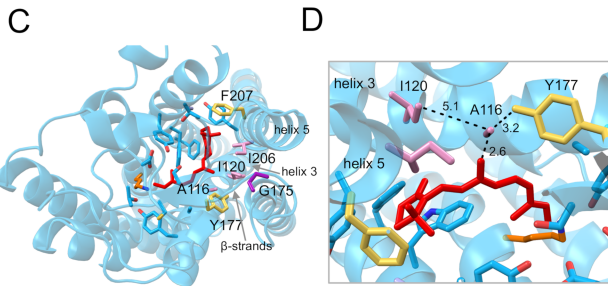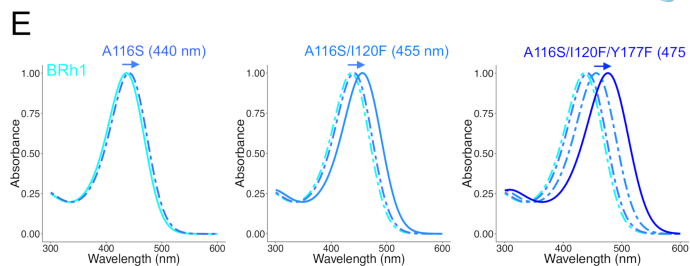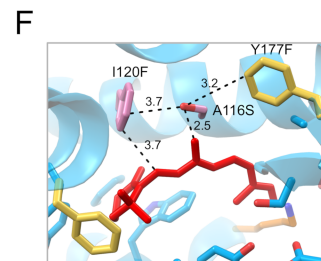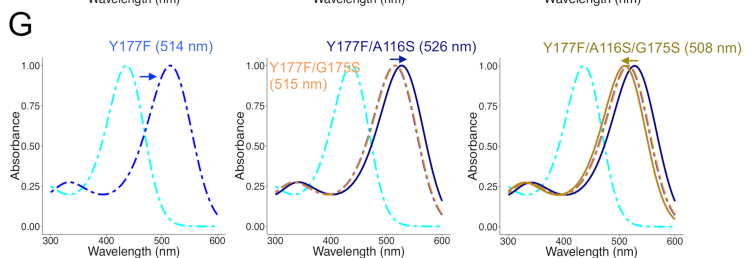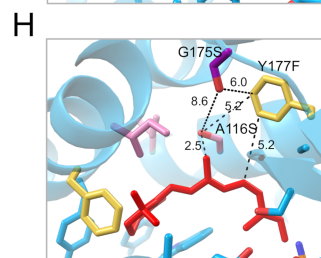

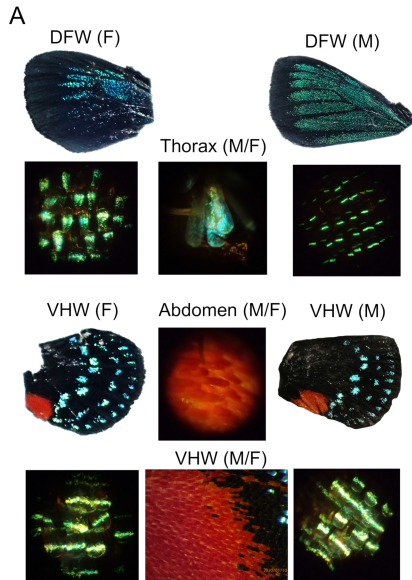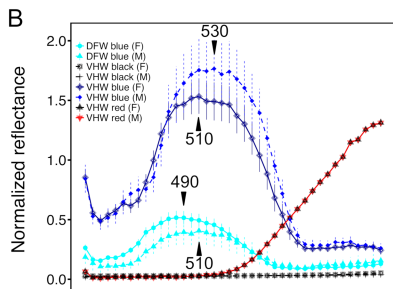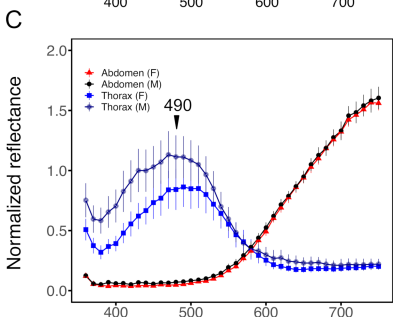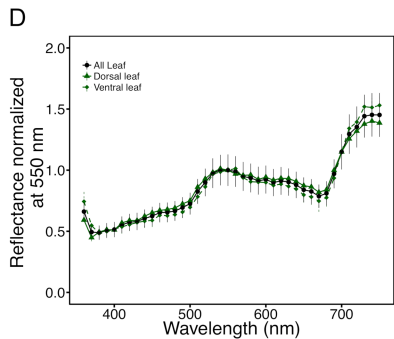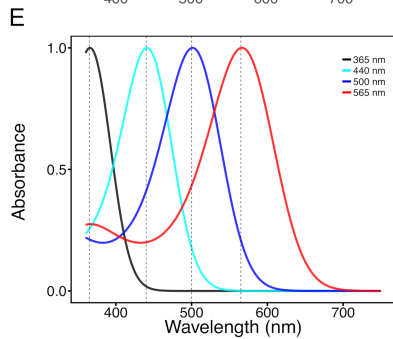

Source: https://www.biorxiv.org/content/10.1101/2020.04.06.027102v2.full.pdf
